# Supplementary material for: KI-mediated radical multi-functionalization of vinyl azides: a one-pot and efficient approach to β-keto sulfones and α-halo-β-keto sulfones
Source: Royal Society of Chemistry journal article supplement (doi:10.1039/c6qo00756b), 2017-01-01

# KI-Mediated Radical Multi-functionalization of Vinyl Azides: A one-pot and efficient approach to $\beta$ -keto sulfones and $\alpha$ -halo- $\beta$ -keto sulfones

Wenteng Chen,<sup>a</sup> Xingyu Liu,<sup>a</sup> En Chen,<sup>a</sup> Binhui Chen,<sup>a</sup> Jiaan Shao,<sup>b,\*</sup>  
Yongping Yu <sup>a,\*</sup>

<sup>a</sup> College of Pharmaceutical Science, Zhejiang University, Hangzhou, 310058, P.R. China.

<sup>b</sup> Department of Chemistry, Zhejiang Sci-Tech University, Hangzhou, 310018, P.R. China.

\* For corresponding author: E-mail: [yyu@zju.edu.cn](mailto:yyu@zju.edu.cn) (for Y. Yu);  
[shaojiaa\\_an@126.com](mailto:shaojiaa_an@126.com) (for J. Shao)

## Supporting Information

### List of contents

|                                                       |          |
|-------------------------------------------------------|----------|
| General Information.....                              | S2       |
| General Procedure for the Synthesis of <b>3</b> ..... | S3       |
| Characterization Data of compound <b>3</b> .....      | S4-S6    |
| General Procedure for the synthesis of <b>4</b> ..... | S6       |
| Characterization Data of compound <b>4</b> .....      | S6       |
| Characterization Data of compound <b>5</b> .....      | S6-S9    |
| General Procedure for the synthesis of <b>6</b> ..... | S9       |
| Characterization Data of compound <b>6</b> .....      | S9-S11   |
| <sup>1</sup> H and <sup>13</sup> C NMR spectra .....  | S12 -S37 |

### General Information:

All solvents were purified according to standard methods prior to use. Purifications of reaction products were carried out by chromatography using silica gel (200-300 mesh). Melting points were recorded on a BÜCHI B-540 melting point apparatus. NMR spectra were recorded for  $^1\text{H}$  NMR at 500 MHz and for  $^{13}\text{C}$  NMR at 125 MHz. For  $^1\text{H}$  NMR, tetramethylsilane (TMS) served as internal standard ( $\delta=0$ ) and data are reported as follows: chemical shift, integration, multiplicity (s = singlet, d = doublet, t = triplet, q = quartet, m = multiplet), and coupling constant(s) in Hz. For  $^{13}\text{C}$  NMR, TMS ( $\delta=0$ ) or  $\text{CDCl}_3$  ( $\delta=77.26$ ) was used as internal standard and spectra were obtained with complete proton decoupling. HPLC analysis and the HRMS of all final products were confirmed on a Agilent 1290 HPLC-6224 Time of Flight Mass Spectrometer using PhenomenexLuna  $5\mu$  C18, 100 Å, 150 X 4.60 mm 5 micron column at a flow rate of 0.5 mL/min using liner gradients buffer B in A (B:  $\text{CH}_3\text{OH}$  containing 0.1 % formic acid, A:  $\text{H}_2\text{O}$  containing 0.1% formic acid). Mobile phase B was increased linearly from 5% to 95% over 7 min and 95% over the next 2 min, after which the column was equilibrated to 5% for 1 min. Vinyl azides **1** were readily prepared from the corresponding olefins by successive reaction with bromine then with sodium azide. <sup>[1]</sup>

Reference:

1. T. L. Gilchrist, R. Mendonca, *ARKIVOC* **2000**, 769.

### General Procedure for the Synthesis of **3**:

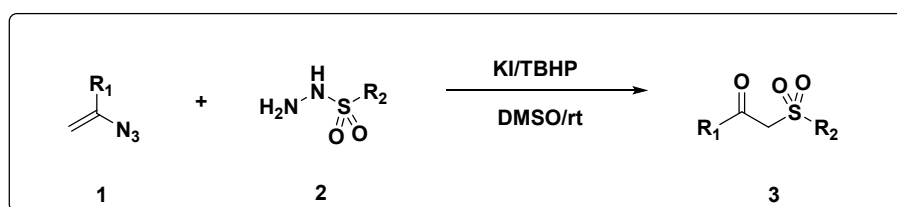

A mixture of vinyl azide **1** (1.0 mmol), sulfonohydrazide **2** (2.0 mmol, 2.0 equiv.) KI (0.4 mmol, 0.4 equiv.) and TBHP (4.0 mmol, 70% in water) was stirred in DMSO (2.0 mL) at room temperature (25 °C) for 6.0-8.0 h. The reaction mixture was quenched with water (10 mL), and then extracted three times with EtOAc. The

combined organic extracts were washed with brine, dried over  $\text{MgSO}_4$  and concentrated. Purification of the crude product by chromatography to afford **3a-3k**.

### Characterization data of compound 3

#### 1-Phenyl-2-tosylethan-1-one (**3a**)

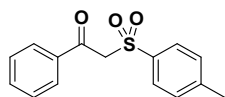

Light yellow solid, m.p. 98.1-99.2 °C,  $^1\text{H}$  NMR (500 MHz,  $\text{CDCl}_3$ )  $\delta$  7.98 (d,  $J = 7.5$  Hz, 2H), 7.79 (d,  $J = 8.5$  Hz, 2H), 7.65 (t,  $J = 7.5$  Hz, 1H), 7.51 (t,  $J = 7.5$  Hz, 2H), 7.36 (d,  $J = 8.0$  Hz, 2H), 4.74 (s, 2H), 2.47 (s, 3H).  $^{13}\text{C}$  NMR (125 MHz,  $\text{CDCl}_3$ )  $\delta$  188.3, 145.5, 136.0, 134.5, 130.0, 129.5, 129.0, 128.8, 63.8, 21.8. HRMS (ESI):  $m/z$  calcd for  $(\text{C}_{15}\text{H}_{14}\text{O}_3\text{S}+\text{H})^+$ : 275.0736; found: 275.0740.

#### 1-(3-Bromo-4-ethoxyphenyl)-2-tosylethan-1-one (**3b**)

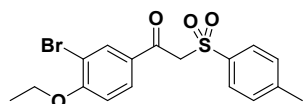

Light yellow solid, m.p. 97.2-98.2 °C,  $^1\text{H}$  NMR (500 MHz,  $\text{CDCl}_3$ )  $\delta$  8.09 (d,  $J = 2.5$  Hz, 1H), 7.93 (dd,  $J = 8.5, 2.5$  Hz, 1H), 7.76-7.72 (m, 2H), 7.34 (d,  $J = 8.0$  Hz, 2H), 6.92 (d,  $J = 8.5$  Hz, 1H), 4.63 (s, 2H), 4.20 (q,  $J = 7.0$  Hz, 2H), 2.45 (s, 3H), 1.52 (t,  $J = 7.0$  Hz, 3H).  $^{13}\text{C}$  NMR (125 MHz,  $\text{CDCl}_3$ )  $\delta$  185.6, 160.3, 145.6, 135.8, 134.8, 131.2, 130.0, 129.7, 128.7, 112.8, 112.0, 65.4, 63.7, 21.8, 14.6. HRMS (ESI):  $m/z$  calcd for  $(\text{C}_{17}\text{H}_{17}\text{BrO}_4\text{S}+\text{H})^+$ : 397.0104; found: 397.0108.

#### 1-(4-Bromophenyl)-2-tosylethan-1-one (**3c**)

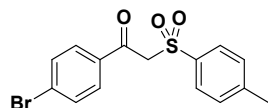

White solid, m.p. 141.2-141.8 °C,  $^1\text{H}$  NMR (500 MHz,  $\text{CDCl}_3$ )  $\delta$  7.98 (d,  $J = 7.5$  Hz, 2H), 7.79 (d,  $J = 8.5$  Hz, 2H), 7.65 (t,  $J = 7.5$  Hz, 1H), 7.51 (t,  $J = 7.5$  Hz, 2H), 7.36 (d,  $J = 8.0$  Hz, 2H), 4.67 (s, 2H), 2.45 (s, 3H).  $^{13}\text{C}$  NMR (125 MHz,  $\text{CDCl}_3$ )  $\delta$  187.4, 145.7, 135.7, 134.6, 132.4, 131.0, 130.1, 130.0, 128.7, 63.9, 21.9. HRMS (ESI):  $m/z$  calcd for  $(\text{C}_{15}\text{H}_{13}\text{BrO}_3\text{S}+\text{H})^+$ : 352.9842; found: 352.9847.

1-(3-Bromophenyl)-2-tosylethan-1-one (**3d**)

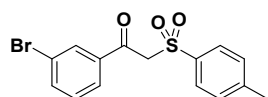

White solid, m.p. 140.2-141.3 °C, <sup>1</sup>H NMR (500 MHz, CDCl<sub>3</sub>) δ 8.02 (s, 1H), 7.91 (d, *J* = 8.0 Hz, 1H), 7.77-7.76 (m, 3H), 7.41-7.36 (m, 3H), 4.69 (s, 2H), 2.47 (s, 3H). <sup>13</sup>C NMR (125 MHz, CDCl<sub>3</sub>) δ 187.1, 145.8, 137.5, 137.3, 135.6, 132.2, 130.5, 130.1, 128.7, 128.2, 123.3, 63.8, 21.9. HRMS (ESI): *m/z* calcd for (C<sub>15</sub>H<sub>14</sub>BrO<sub>3</sub>S+H)<sup>+</sup>: 352.9842; found: 352.9850.

Methyl 4-(2-tosylacetyl) benzoate (**3e**)

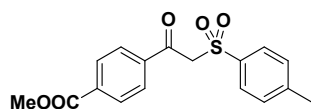

White solid, m.p. 95.2-95.5 °C, <sup>1</sup>H NMR (500 MHz, CDCl<sub>3</sub>) δ 8.14-8.12 (m, 2H), 8.02-8.00 (m, 2H), 7.75 (d, *J* = 8.5 Hz, 2H), 7.35 (d, *J* = 8.0 Hz, 2H), 4.74 (s, 2H), 3.96 (s, 3H), 2.45 (s, 3H). <sup>13</sup>C NMR (125 MHz, CDCl<sub>3</sub>) δ 188.0, 166.0, 145.7, 138.9, 135.8, 135.0, 130.1, 130.0, 129.4, 128.7, 64.0, 62.7, 21.8. HRMS (ESI): *m/z* calcd for (C<sub>17</sub>H<sub>17</sub>O<sub>5</sub>S+H)<sup>+</sup>: 333.0791; found: 333.0795.

1-(3-Nitrophenyl)-2-tosylethan-1-one (**3f**)

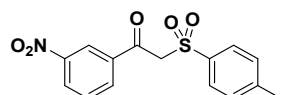

Light yellow solid, m.p. 127.1-127.8 °C, <sup>1</sup>H NMR (500 MHz, CDCl<sub>3</sub>) δ 8.73 (t, *J* = 2.0 Hz, 1H), 8.48-8.46 (m, 1H), 8.35-8.33 (m, 1H), 7.76-7.72 (m, 3H), 7.36 (d, *J* = 8.0 Hz, 2H), 4.77 (s, 2H), 2.46 (s, 3H). <sup>13</sup>C NMR (125 MHz, CDCl<sub>3</sub>) δ 186.5, 148.6, 146.0, 137.0, 135.5, 135.0, 130.3, 130.2, 128.6, 128.5, 124.3, 64.0, 21.8. HRMS (ESI): *m/z* calcd for (C<sub>15</sub>H<sub>14</sub>NO<sub>5</sub>S+H)<sup>+</sup>: 320.0587; found: 320.0594.

1-Phenyl-2-(phenylsulfonyl) ethan-1-one (**3g**)

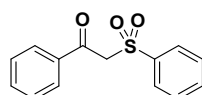

White solid, m.p. 121.5-123.1 °C, <sup>1</sup>H NMR (500 MHz, CDCl<sub>3</sub>) δ 7.94 (d, *J* = 7.5 Hz, 2H), 7.90 (d, *J* = 7.5 Hz, 2H), 7.68-7.65 (m, 1H), 7.64-7.61 (m, 1H), 7.55 (t, *J* = 8.0 Hz, 2H), 7.48 (t, *J* = 8.0 Hz, 2H), 4.74 (s, 2H). <sup>13</sup>C NMR (125 MHz, CDCl<sub>3</sub>) δ 188.1,

138.9, 135.9, 134.5, 134.4, 129.4, 129.3, 129.0, 128.7, 63.6, 29.8. HRMS (ESI):  $m/z$  calcd for  $(C_{14}H_{13}O_3S+H)^+$ : 261.0580; found: 261.0587.

2-((4-Bromophenyl) sulfonyl)-1-phenylethan-1-one (**3h**)

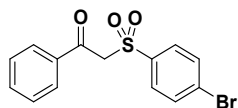

Light yellow solid, m.p. 113.2-114.2 °C,  $^1H$  NMR (500 MHz,  $CDCl_3$ )  $\delta$  7.95-7.93 (m, 2H), 7.77-7.75(m, 2H), 7.71-7.69 (m, 2H), 7.66-7.63 (m, 1H), 7.52-7.49 (m, 2H), 4.74 (s, 2H).  $^{13}C$  NMR (125 MHz,  $CDCl_3$ )  $\delta$  188.0, 137.9, 135.8, 134.7, 132.7, 130.4, 129.9, 129.4, 129.1, 63.5. HRMS (ESI):  $m/z$  calcd for  $(C_{14}H_{12}BrO_3S+H)^+$ : 338.9685; found: 338.9690.

2-((4-Methoxyphenyl) sulfonyl)-1-phenylethan-1-one (**3i**)

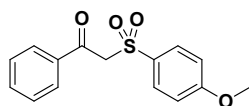

White solid, m.p. 105.2-106.3 °C,  $^1H$  NMR (500 MHz,  $CDCl_3$ )  $\delta$  7.95 (d,  $J = 7.5$  Hz, 2H), 7.80 (d,  $J = 8.5$  Hz, 2H), 7.62 (t,  $J = 7.5$  Hz, 1H), 7.48 (t,  $J = 7.5$  Hz, 2H), 6.98 (d,  $J = 8.5$  Hz, 2H), 4.71 (s, 2H), 3.87 (s, 3H).  $^{13}C$  NMR (125 MHz,  $CDCl_3$ )  $\delta$  188.4, 164.3, 136.0, 134.4, 131.0, 130.4, 129.5, 128.9, 114.5, 63.9, 55.8. HRMS (ESI):  $m/z$  calcd for  $(C_{15}H_{15}O_4S+H)^+$ : 291.0686; found: 291.0687.

1-(4-Bromophenyl)-2-((4-methoxyphenyl) sulfonyl) ethan-1-one (**3j**)

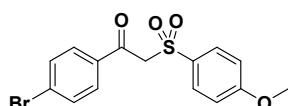

Light yellow solid, m.p. 135.2-136.7 °C,  $^1H$  NMR (500 MHz,  $CDCl_3$ )  $\delta$  7.82 (d,  $J = 8.5$  Hz, 2H), 7.77 (d,  $J = 8.5$  Hz, 2H), 7.63 (d,  $J = 8.5$  Hz, 2H), 6.99 (d,  $J = 8.5$  Hz, 2H), 4.67 (s, 2H), 3.88 (s, 3H).  $^{13}C$  NMR (125 MHz,  $CDCl_3$ )  $\delta$  187.6, 164.4, 134.7, 132.4, 131.0, 130.1, 130.0, 114.6, 64.1, 55.9. HRMS (ESI):  $m/z$  calcd for  $(C_{15}H_{14}BrO_4S+H)^+$ : 368.9791; found: 368.9797.

### 1-(4-Bromophenyl)-2-(propylsulfonyl) ethan-1-one (**3k**)

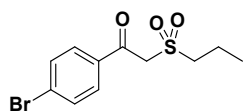

Light yellow solid, m.p.: 83.2-84.4 °C, <sup>1</sup>H NMR (500 MHz, CDCl<sub>3</sub>) δ 7.88 (d, *J* = 9.0 Hz, 2H), 7.67 (d, *J* = 9.0 Hz, 2H), 4.52 (s, 2H), 3.22-3.19 (m, 2H), 1.99-1.88 (m, 2H), 1.11 (t, *J* = 7.5 Hz, 3H). <sup>13</sup>C NMR (125 MHz, CDCl<sub>3</sub>) δ 188.5, 134.6, 132.5, 130.9, 130.5, 59.8, 55.4, 15.9, 13.2. HRMS (ESI): *m/z* calcd for (C<sub>11</sub>H<sub>14</sub>BrO<sub>3</sub>S+H)<sup>+</sup>: 304.9842; found: 304.9838.

### Characterization data of compound 4

#### (*Z*)-4-methyl-N-(1-tosyloct-1-en-2-yl)benzenesulfonamide (**4**)

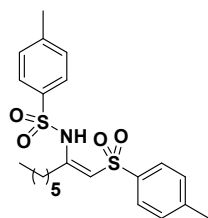

Light yellow solid, m.p.: 93.2-94.6 °C, <sup>1</sup>H NMR (500 MHz, CDCl<sub>3</sub>) δ 8.98 (s, 1H), 7.93 (d, *J* = 8.0 Hz, 2H), 7.86 (d, *J* = 8.0 Hz, 2H), 7.31-7.26 (m, 4H), 5.48 (s, 1H), 2.67- 2.64 (m, 2H), 2.41 (d, *J* = 7.0 Hz, 6H), 1.40-1.35 (m, 2H), 1.25-1.12 (m, 6H), 0.85 (t, *J* = 7.0 Hz, 3H).

### General Procedure for the Synthesis of 5:

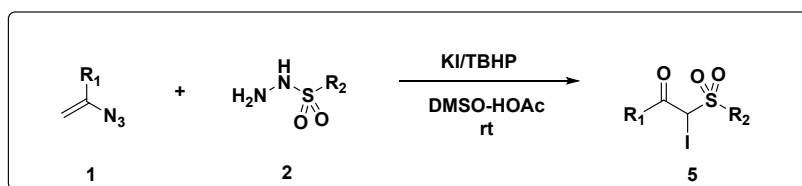

A mixture of vinyl azide **1** (1.0 mmol), sulfonohydrazide **2** (2.0 mmol, 2.0 equiv.) KI (1.5 mmol, 1.5 equiv.) and TBHP (4.0 mmol, 70% in water) was stirred in DMSO-HOAc (2.0 mL, V: V=1:1) at room temperature (25 °C) for 8.0 h. The reaction mixture was quenched with water (10 mL), and then extracted three times with EtOAc. The combined organic extracts were washed with brine, dried over MgSO<sub>4</sub> and concentrated. Purification of the crude product by chromatography to afford **5a-5j**.

### Characterization data of compound 5

2-Iodo-1-phenyl-2-tosylethan-1-one (**5a**)

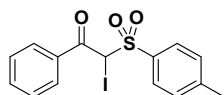

White solid, m.p. 168.2-169.3 °C, <sup>1</sup>H NMR (500 MHz, CDCl<sub>3</sub>) δ 7.90 (dd, *J* = 12.5, 8.0 Hz, 4H), 7.63 (t, *J* = 7.5 Hz, 1H), 7.48 (t, *J* = 8.0 Hz, 2H), 7.35 (d, *J* = 8.0 Hz, 2H), 6.52 (s, 1H), 2.45 (s, 3H). <sup>13</sup>C NMR (125 MHz, CDCl<sub>3</sub>) δ 188.4, 146.3, 134.6, 133.8, 132.3, 131.1, 129.7, 129.3, 129.1, 38.0, 21.9. HRMS (ESI): *m/z* calcd for (C<sub>15</sub>H<sub>13</sub>IO<sub>3</sub>S+H)<sup>+</sup>: 400.9703; found: 400.9703.

1-(3-Bromo-4-ethoxyphenyl)-2-iodo-2-tosylethan-1-one (**5b**)

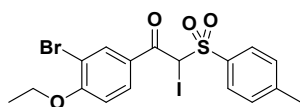

Pale white solid, m.p. 172.2-173.4 °C, <sup>1</sup>H NMR (500 MHz, CDCl<sub>3</sub>) δ 8.08 (d, *J* = 2.0 Hz, 1H), 7.90 (dd, *J* = 8.5, 2.5 Hz, 1H), 7.86 (d, *J* = 8.0 Hz, 2H), 7.35 (d, *J* = 8.0 Hz, 2H), 6.90 (d, *J* = 8.5 Hz, 1H), 6.42 (s, 1H), 4.19 (q, *J* = 7.0 Hz, 2H), 2.45 (s, 3H), 1.51 (t, *J* = 7.0 Hz, 3H). <sup>13</sup>C NMR (125 MHz, CDCl<sub>3</sub>) δ 185.7, 160.4, 146.3, 134.8, 132.2, 131.0, 130.9, 129.7, 128.7, 127.1, 112.9, 112.1, 65.5, 38.2, 21.9, 14.6. HRMS (ESI): *m/z* calcd for (C<sub>17</sub>H<sub>16</sub>BrIO<sub>4</sub>S+H)<sup>+</sup>: 522.9070; found: 522.9074.

1-(3-Bromo-4-ethoxyphenyl)-2-iodo-2-tosylethan-1-one (**5c**)

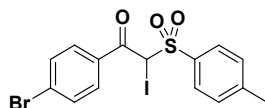

Pale white solid, m.p. 147.3-148.2 °C, <sup>1</sup>H NMR (500 MHz, DMSO) δ 7.89-7.88 (m, 2H), 7.83 (d, *J* = 8.0 Hz, 2H), 7.73-7.71 (m, 2H), 7.45 (s, 1H), 7.41 (d, *J* = 8.0 Hz, 2H), 2.38 (s, 2H). <sup>13</sup>C NMR (125 MHz, DMSO) δ 189.0, 145.2, 133.1, 132.5, 132.0, 130.8, 129.6, 129.5, 128.8, 39.2, 21.2. HRMS (ESI): *m/z* calcd for (C<sub>15</sub>H<sub>12</sub>BrIO<sub>3</sub>S+H)<sup>+</sup>: 478.8808; found: 478.8809.

Methyl 4-(2-iodo-2-tosylacetyl) benzoate (**5d**)

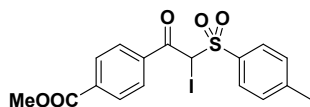

Pale white solid, m.p. 125.2-126.3 °C, <sup>1</sup>H NMR (500 MHz, CDCl<sub>3</sub>) δ 8.12 (d, *J* = 8.0 Hz, 2H), 7.97 (d, *J* = 8.5 Hz, 2H), 7.88 (d, *J* = 8.5 Hz, 2H), 7.36 (d, *J* = 8.5 Hz, 2H),

6.48 (s, 1H), 3.96 (s, 3H), 2.46 (s, 3H). <sup>13</sup>C NMR (125 MHz, CDCl<sub>3</sub>) δ 188.1, 165.9, 146.5, 137.0, 135.2, 132.2, 131.1, 130.2, 129.7, 129.3, 52.8, 38.1, 21.9. HRMS (ESI): m/z calcd for (C<sub>17</sub>H<sub>15</sub>IO<sub>5</sub>S+H)<sup>+</sup>: 458.9758; found: 458.9760.

2-Iodo-1-(3-nitrophenyl)-2-tosylethan-1-one (**5e**)

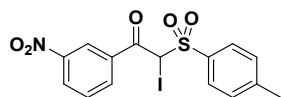

Yellow solid, m.p. 148.2-149.3 °C, <sup>1</sup>H NMR (500 MHz, CDCl<sub>3</sub>) δ 8.73 (s, 1H), 8.48 (d, *J* = 8.0 Hz, 2H), 8.32 (d, *J* = 8.0 Hz, 2H), 7.88 (d, *J* = 8.0 Hz, 2H), 7.72 (t, *J* = 8.0 Hz, 1H), 7.38 (d, *J* = 8.0 Hz, 2H), 6.48 (s, 1H), 2.47 (s, 3H). <sup>13</sup>C NMR (125 MHz, CDCl<sub>3</sub>) δ 186.6, 148.7, 146.8, 135.1, 134.9, 132.2, 131.0, 130.4, 129.9, 128.6, 124.3, 38.1, 21.9. HRMS (ESI): m/z calcd for (C<sub>15</sub>H<sub>12</sub>INO<sub>5</sub>S+H)<sup>+</sup>: 445.9554; found: 445.9558.

2-Iodo-1-phenyl-2-(phenylsulfonyl) ethan-1-one (**5f**)

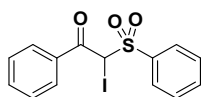

White solid, m.p. 136.2-137.4 °C, <sup>1</sup>H NMR (500 MHz, CDCl<sub>3</sub>) δ 8.02 (d, *J* = 8.0 Hz, 2H), 7.90 (d, *J* = 8.0 Hz, 2H), 7.68 (t, *J* = 2.5 Hz, 1H), 7.62 (d, *J* = 2.5 Hz, 1H), 7.56 (t, *J* = 8.0 Hz, 1H), 7.47 (t, *J* = 8.0 Hz, 1H), 6.53 (s, 1H). <sup>13</sup>C NMR (125 MHz, CDCl<sub>3</sub>) δ 188.3, 135.3, 135.0, 134.8, 133.6, 131.0, 129.3, 129.2, 129.0, 37.6. HRMS (ESI): m/z calcd for (C<sub>14</sub>H<sub>12</sub>IO<sub>3</sub>S+H)<sup>+</sup>: 386.9546; found: 386.9553.

2-Iodo-2-((4-methoxyphenyl) sulfonyl)-1-phenylethan-1-one (**5g**)

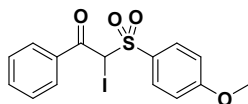

White solid, m.p. 132.1-133.3 °C, <sup>1</sup>H NMR (500 MHz, DMSO) δ 7.96 (d, *J* = 7.5 Hz, 2H), 7.88 (d, *J* = 8.5 Hz, 2H), 7.64 (t, *J* = 7.5 Hz, 1H), 7.48 (t, *J* = 7.5 Hz, 2H), 7.42 (s, 1H), 7.12-7.11 (m, 2H), 3.82 (s, 3H). <sup>13</sup>C NMR (125 MHz, DMSO) δ 189.6, 163.7, 134.3, 133.5, 132.1, 128.9, 128.8, 127.3, 114.2, 55.8, 39.3. HRMS (ESI): m/z calcd for (C<sub>15</sub>H<sub>14</sub>IO<sub>4</sub>S+H)<sup>+</sup>: 416.9652; found: 416.9659.

1-(4-Bromophenyl)-2-iodo-2-((4-methoxyphenyl) sulfonyl) ethan-1-one (**5h**)



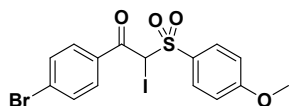

Yellow solid, m.p. 156.2-157.4 °C,  $^1\text{H}$  NMR (500 MHz,  $\text{CDCl}_3$ )  $\delta$  7.95-7.89 (m, 2H), 7.80 (d,  $J = 8.5$  Hz, 2H), 7.64-7.61 (m, 2H), 7.05 -6.98 (m, 2H), 6.44 (s, 1H), 3.89 (s, 3H).  $^{13}\text{C}$  NMR (125 MHz,  $\text{CDCl}_3$ )  $\delta$  187.7, 164.9, 133.4, 132.5, 132.4, 130.8, 130.3, 126.3, 114.3, 55.9, 38.2. HRMS (ESI):  $m/z$  calcd for  $(\text{C}_{15}\text{H}_{13}\text{BrIO}_4\text{S}+\text{H})^+$ : 494.8757; found: 494.8763.

2-((4-Bromophenyl) sulfonyl)-2-iodo-1-phenylethan-1-one (**5i**)

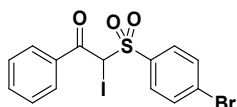

Light yellow solid, m.p. 131.2-132.4 °C,  $^1\text{H}$  NMR (500 MHz, DMSO)  $\delta$  7.96 (d,  $J = 7.5$  Hz, 2H), 7.90-7.85 (m, 4H), 7.66 (t,  $J = 7.5$  Hz, 1H), 7.53 (s, 1H), 7.49 (d,  $J = 7.5$  Hz, 2H).  $^{13}\text{C}$  NMR (125 MHz, DMSO)  $\delta$  189.1, 138.8, 135.6, 134.3, 132.3, 130.2, 129.0, 128.8, 128.2, 39.4. HRMS (ESI):  $m/z$  calcd for  $(\text{C}_{14}\text{H}_{11}\text{BrIO}_3\text{S}+\text{H})^+$ : 464.8651; found: 464.8655.

1-(4-Bromophenyl)-2-iodo-2-(propylsulfonyl) ethan-1-one (**5j**)

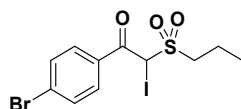

White solid, 118.2-119.3 °C,  $^1\text{H}$  NMR (500 MHz,  $\text{CDCl}_3$ )  $\delta$  7.84 (d,  $J = 8.5$  Hz, 2H), 7.66 (d,  $J = 8.5$  Hz, 2H), 6.31 (s, 1H), 3.72-3.50 (m, 2H), 2.04-1.89 (m, 2H), 1.14 (t,  $J = 7.5$  Hz, 3H).  $^{13}\text{C}$  NMR (125 MHz,  $\text{CDCl}_3$ )  $\delta$  188.5, 132.7, 132.0, 130.8, 130.7, 52.3, 33.6, 15.2, 13.3. HRMS (ESI):  $m/z$  calcd for  $(\text{C}_{11}\text{H}_{12}\text{BrIO}_3\text{S}+\text{H})^+$ : 430.8808; found: 430.8809.

**General Procedure for the Synthesis of 6:**

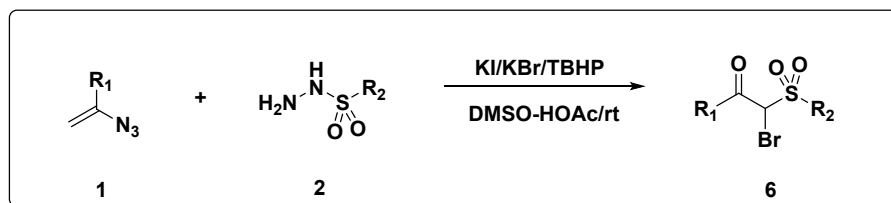

A mixture of vinyl azide **1** (1.0 mmol), sulfonylhydrazide **2** (2.0 mmol, 2.0 equiv.), KI (0.4 mmol, 0.4 equiv.), KBr (1.0 mmol, 1.0 equiv.) and TBHP (4.0 mmol, 70% in

water) was stirred in DMSO (2.0 mL) at room temperature (25 °C) for 6.0-8.0 h. The reaction mixture was quenched with water (10 mL), and then extracted three times with EtOAc. The combined organic extracts were washed with brine, dried over MgSO<sub>4</sub> and concentrated. Purification of the crude product by chromatography to afford **6a-6h**.

### Characterization data of compound 6

#### 2-Bromo-1-phenyl-2-tosylethan-1-one (**6a**)

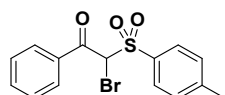

White solid, m.p. 149.2-150.0 °C, <sup>1</sup>H NMR (500 MHz, CDCl<sub>3</sub>) δ 8.00 (d, *J* = 7.0 Hz, 2H), 7.84 (d, *J* = 8.5 Hz, 2H), 7.66 (t, *J* = 7.5 Hz, 1H), 7.52 (t, *J* = 8.0 Hz, 2H), 7.38 (d, *J* = 8.0 Hz, 2H), 6.22 (s, 1H), 2.47 (s, 3H). <sup>13</sup>C NMR (125 MHz, CDCl<sub>3</sub>) δ 186.9, 146.6, 134.8, 131.7, 131.1, 130.5, 129.7, 129.6, 129.1, 60.3, 22.0. HRMS (ESI): *m/z* calcd for (C<sub>16</sub>H<sub>13</sub>BrO<sub>5</sub>S+H)<sup>+</sup>: 351.9769; found: 352.9850.

#### 2-Bromo-1-(4-bromophenyl)-2-tosylethan-1-one (**6d**)

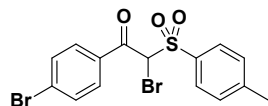

Light yellow solid, m.p. 157.8-159.8 °C, <sup>1</sup>H NMR (500 MHz, CDCl<sub>3</sub>) δ 7.91-7.86 (m, 2H), 7.82 (d, *J* = 8.0 Hz, 2H), 7.69-7.64 (m, 2H), 7.38 (d, *J* = 8.0 Hz, 2H), 6.13 (s, 1H), 2.48 (s, 3H). <sup>13</sup>C NMR (125 MHz, CDCl<sub>3</sub>) δ 186.0, 146.8, 133.2, 132.5, 131.9, 131.2, 131.0, 130.5, 129.8, 60.7, 22.0. HRMS (ESI): *m/z* calcd for (C<sub>15</sub>H<sub>13</sub>Br<sub>2</sub>O<sub>3</sub>S+H)<sup>+</sup>: 430.8947; found: 430.8954.

#### Ethyl 4-(2-bromo-2-tosylacetyl)benzoate (**6e**)

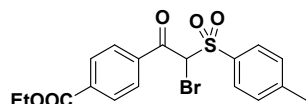

White solid, m.p. 127.7-128.7 °C, <sup>1</sup>H NMR (500 MHz, CDCl<sub>3</sub>) δ 8.16 (d, *J* = 8.0 Hz, 2H), 8.06 (d, *J* = 8.5 Hz, 2H), 7.83 (d, *J* = 8.5 Hz, 2H), 7.38 (d, *J* = 8.0 Hz, 2H), 6.20 (s, 1H), 3.96 (s, 3H), 2.47 (s, 3H). <sup>13</sup>C NMR (125 MHz, CDCl<sub>3</sub>) δ 186.6, 165.9, 146.8, 137.6, 135.3, 131.8, 131.0, 130.2, 129.8, 129.6, 60.5, 52.8, 22.0. HRMS (ESI): *m/z* calcd for (C<sub>16</sub>H<sub>13</sub>BrO<sub>5</sub>S+H)<sup>+</sup>: 409.9824; found: 410.9896.

2-Bromo-1-phenyl-2-(phenylsulfonyl)ethan-1-one (**6f**)

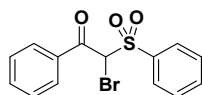

White solid, m.p. 127.2-129.2 °C,  $^1\text{H}$  NMR (500 MHz,  $\text{CDCl}_3$ )  $\delta$  7.99 (t,  $J = 7.5$  Hz, 4H), 7.73 (t,  $J = 7.5$  Hz, 1H), 7.66 (t,  $J = 7.5$  Hz, 1H), 7.59 (t,  $J = 8.0$  Hz, 2H), 7.52 (t,  $J = 8.0$  Hz, 2H), 6.23 (s, 1H).  $^{13}\text{C}$  NMR (126 MHz,  $\text{CDCl}_3$ )  $\delta$  186.7, 135.2, 134.8, 134.5, 131.1, 129.6, 129.1, 60.1. HRMS (ESI):  $m/z$  calcd for  $(\text{C}_{16}\text{H}_{13}\text{BrO}_5\text{S}+\text{H})^+$ : 337.9612; found: 338.9687.

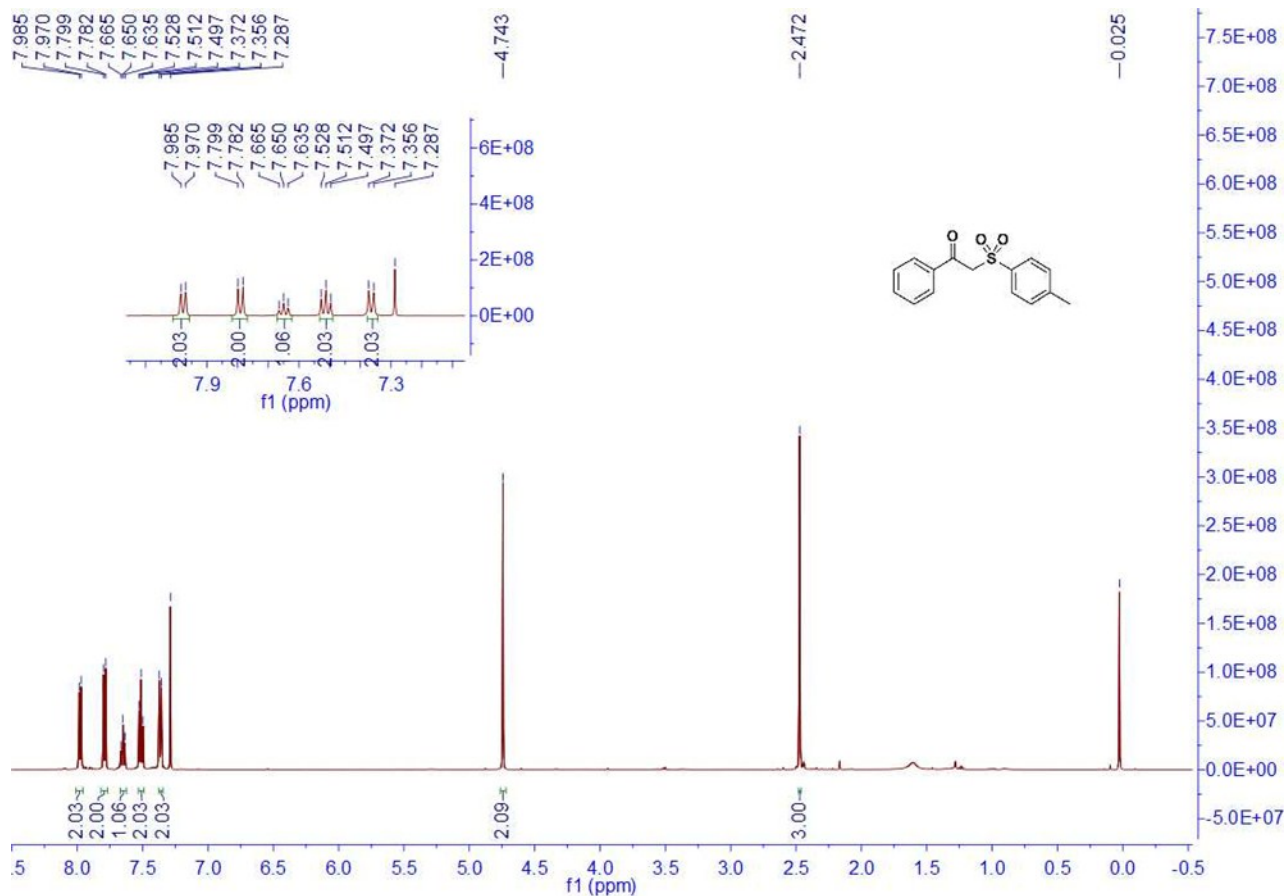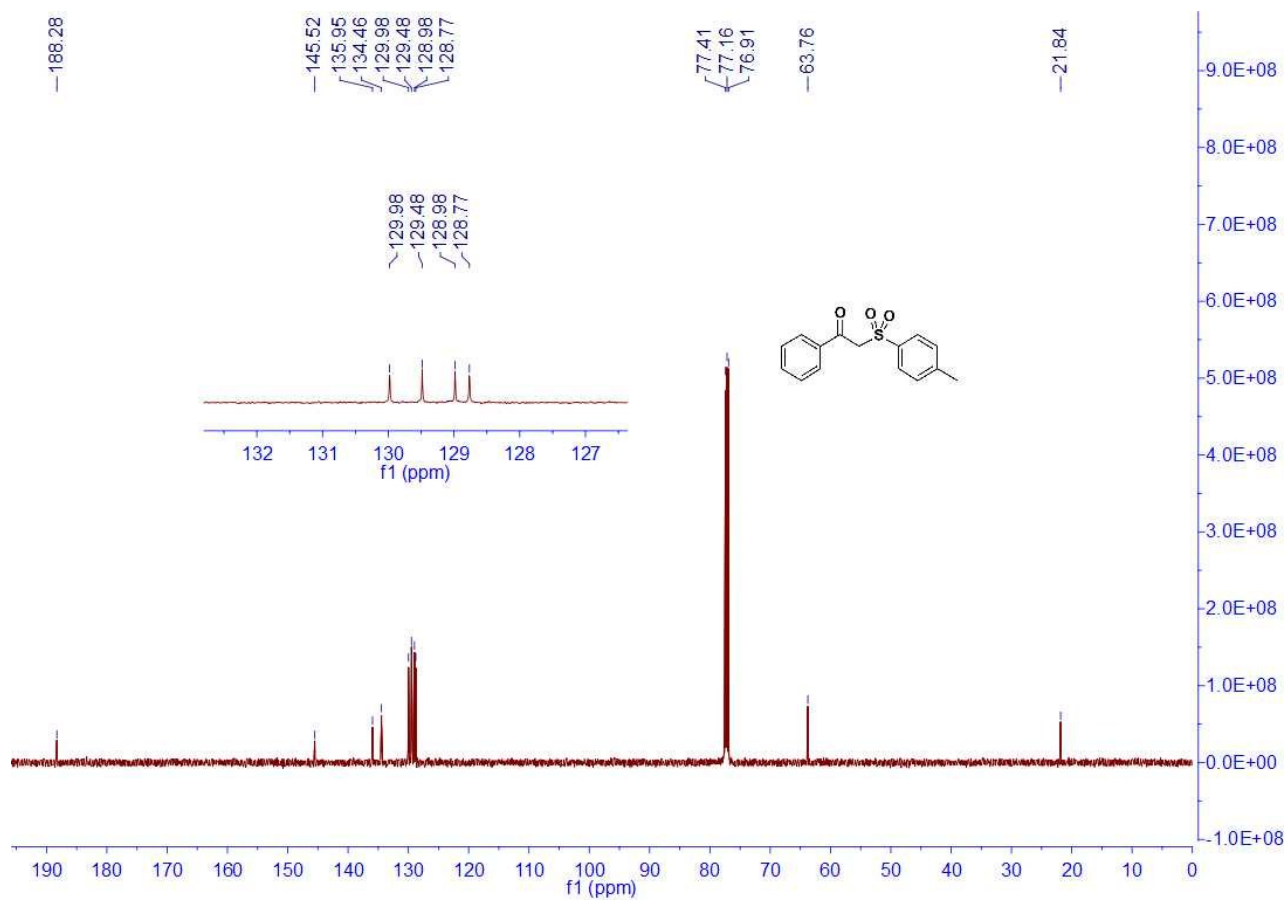

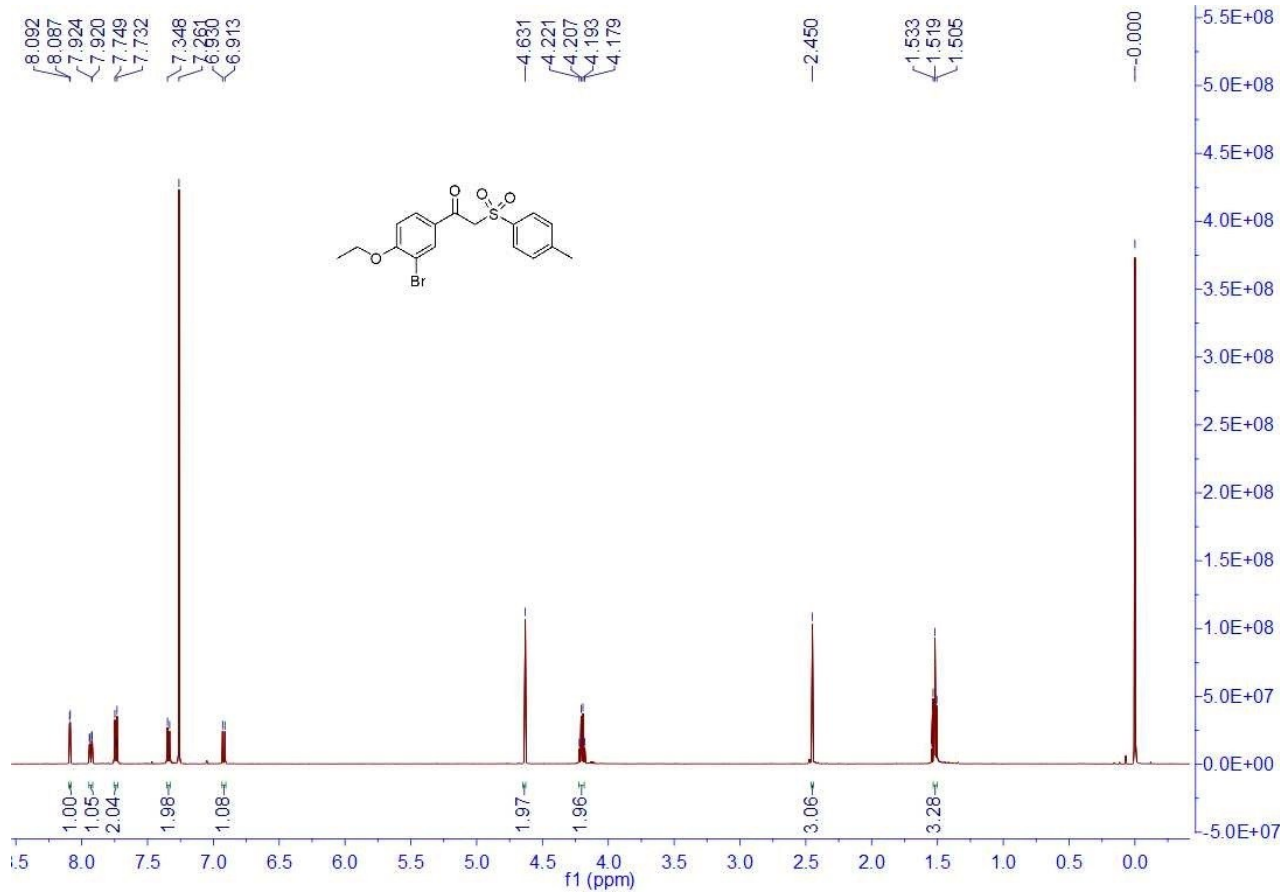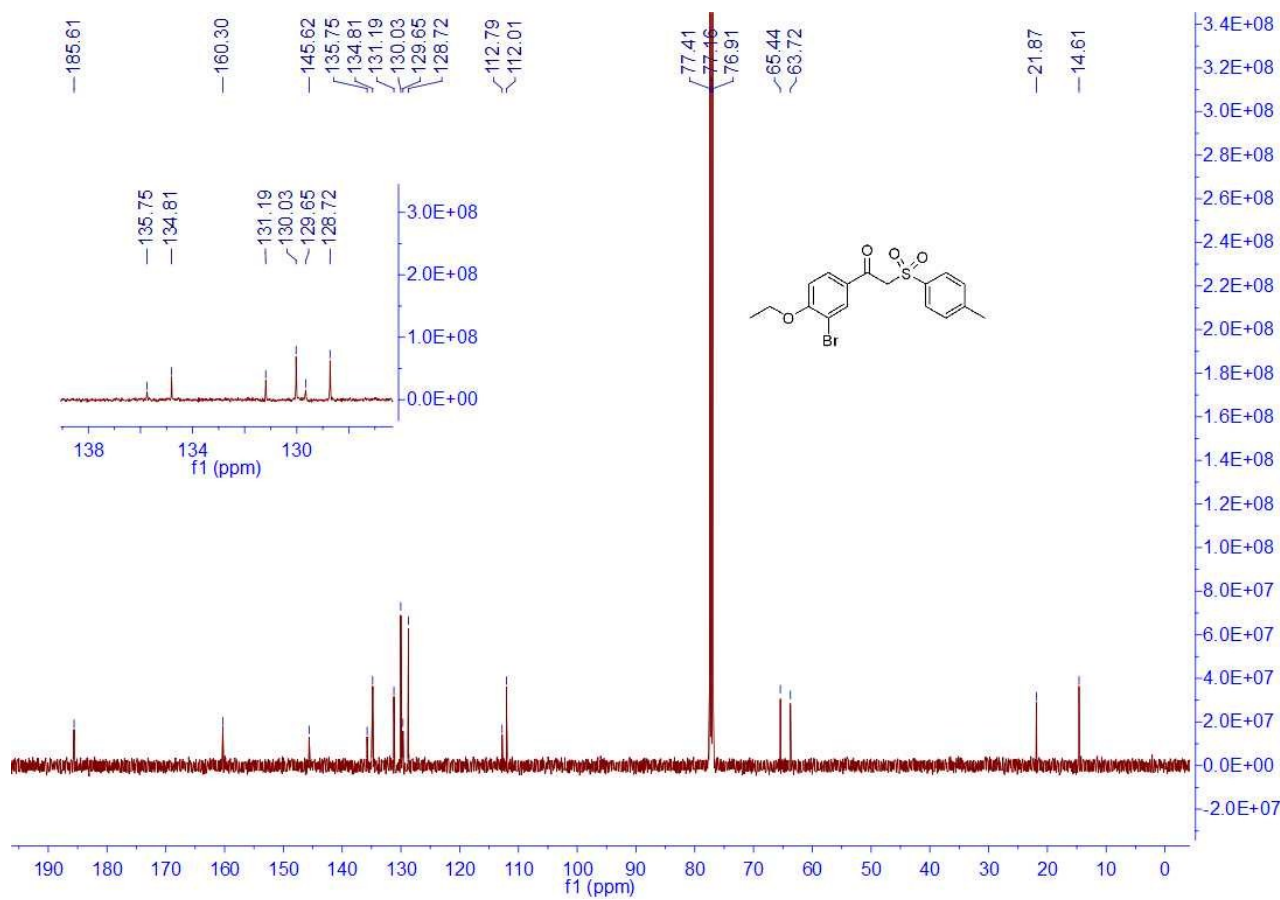

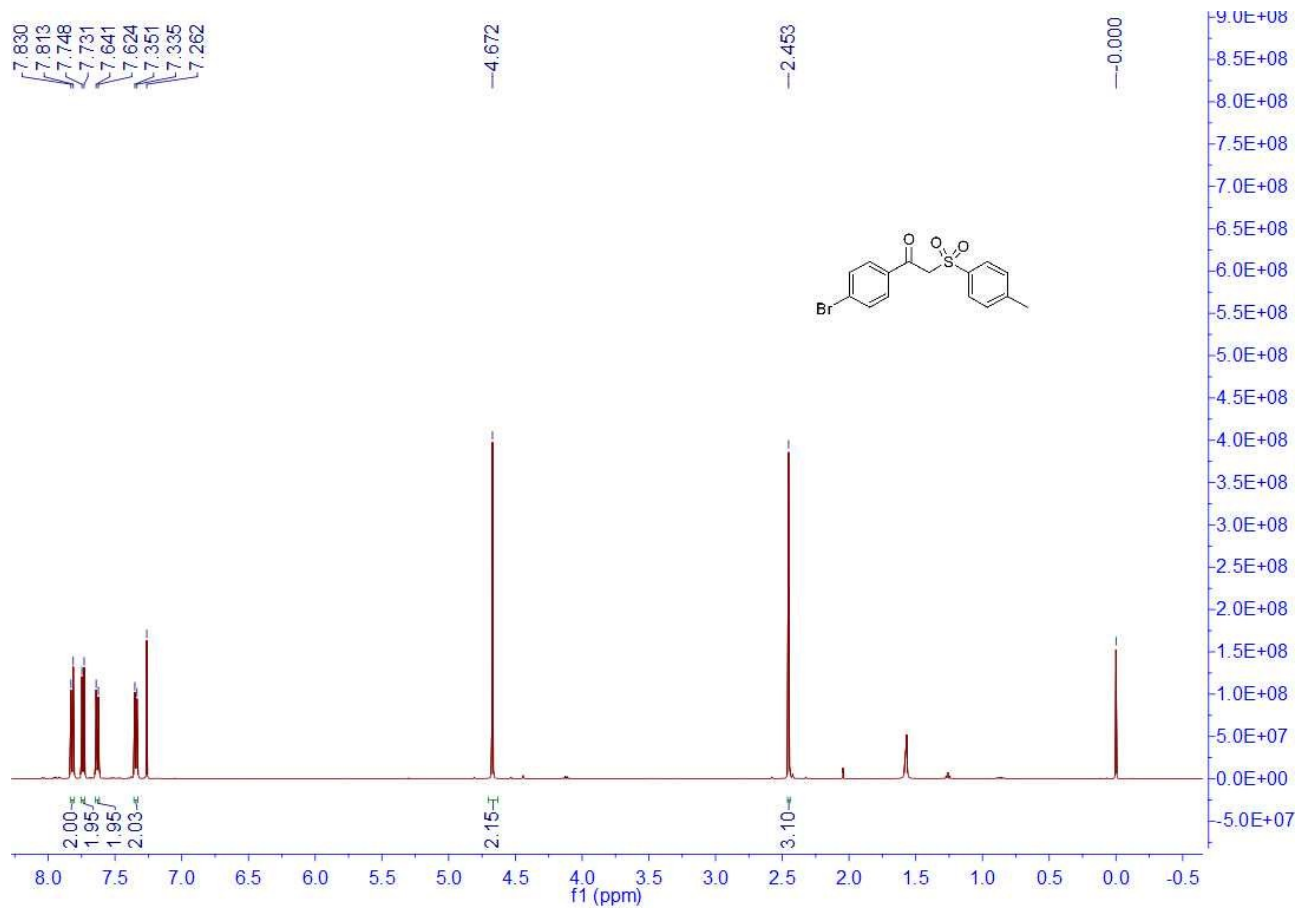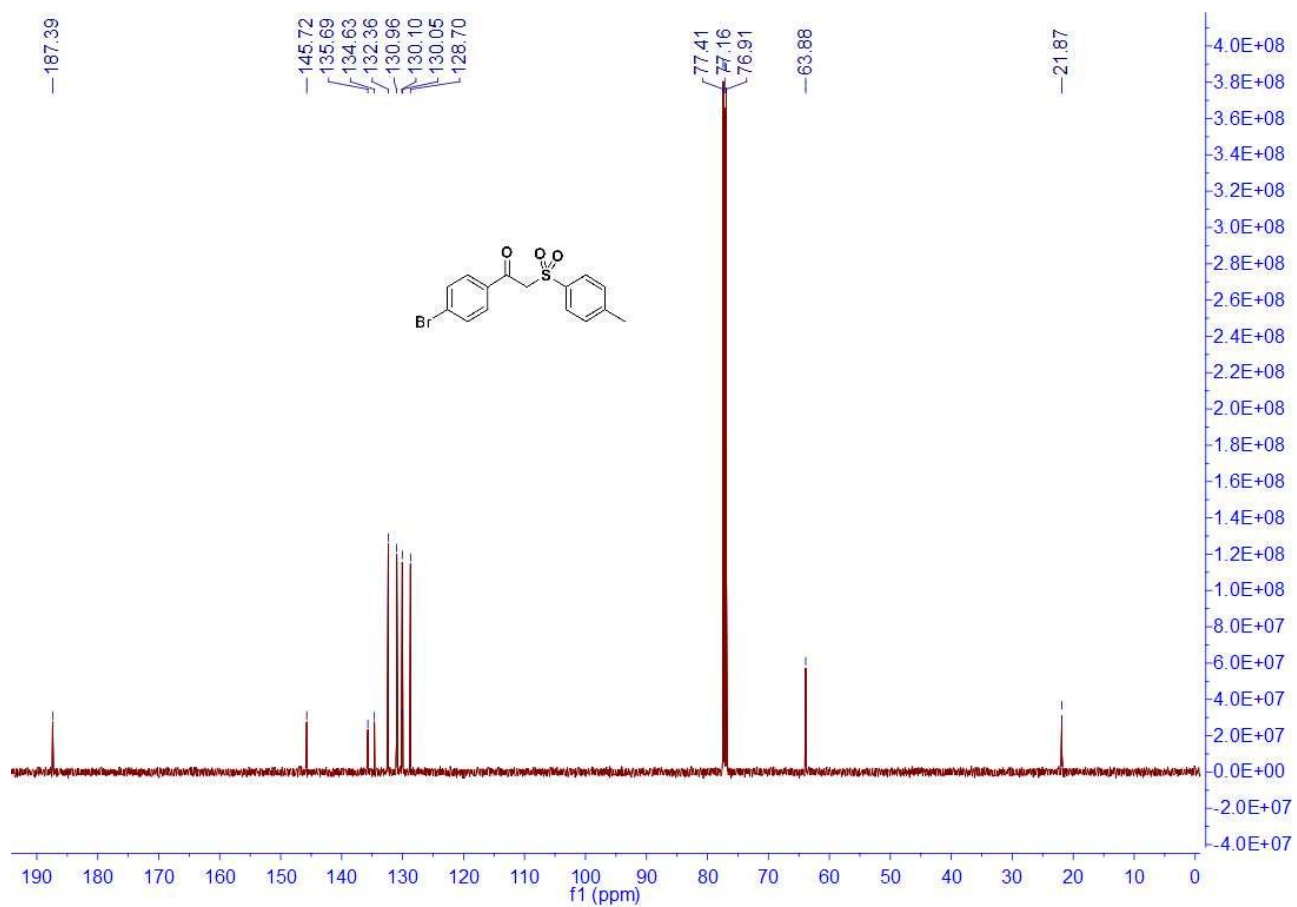

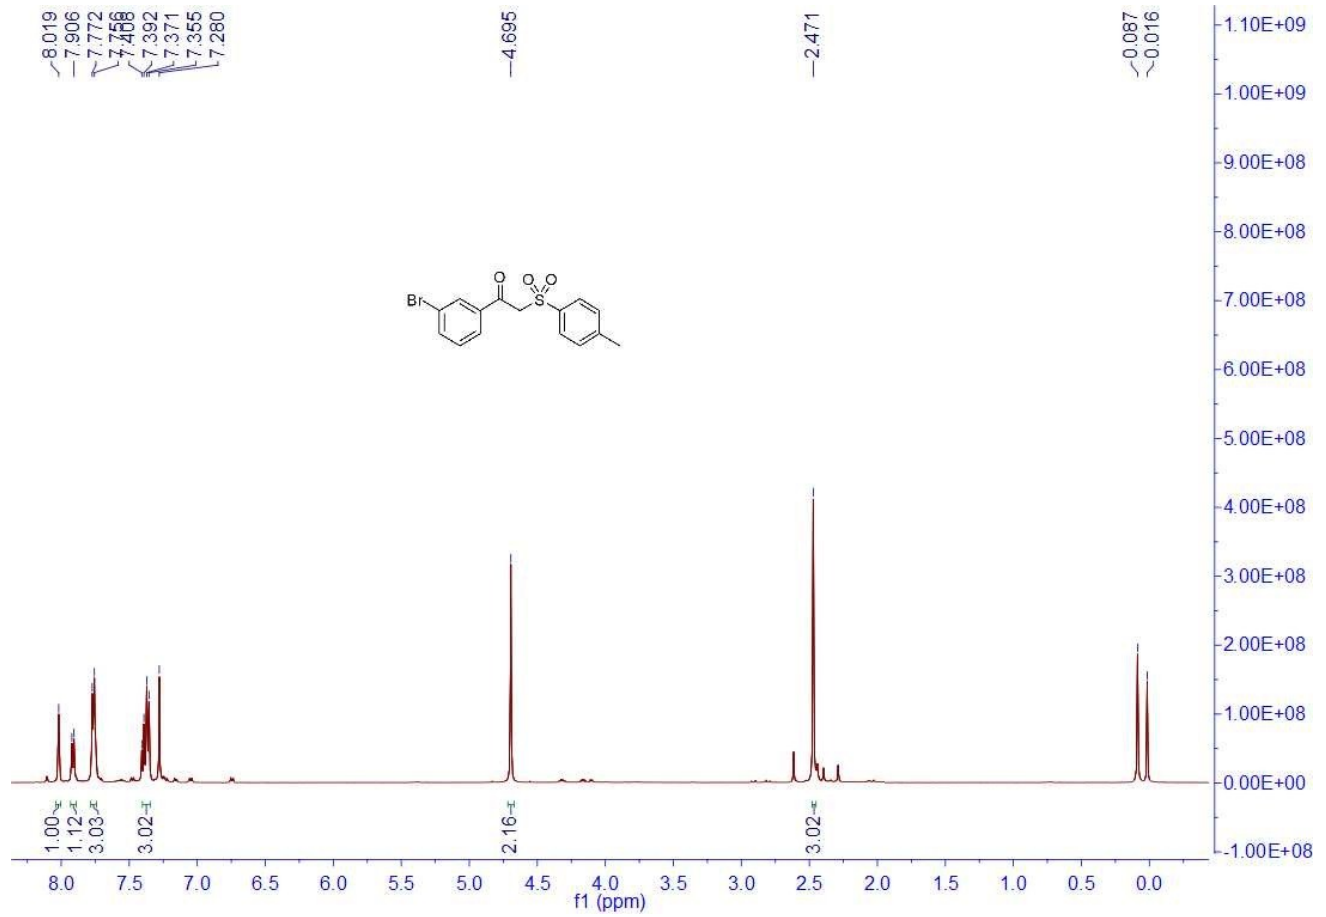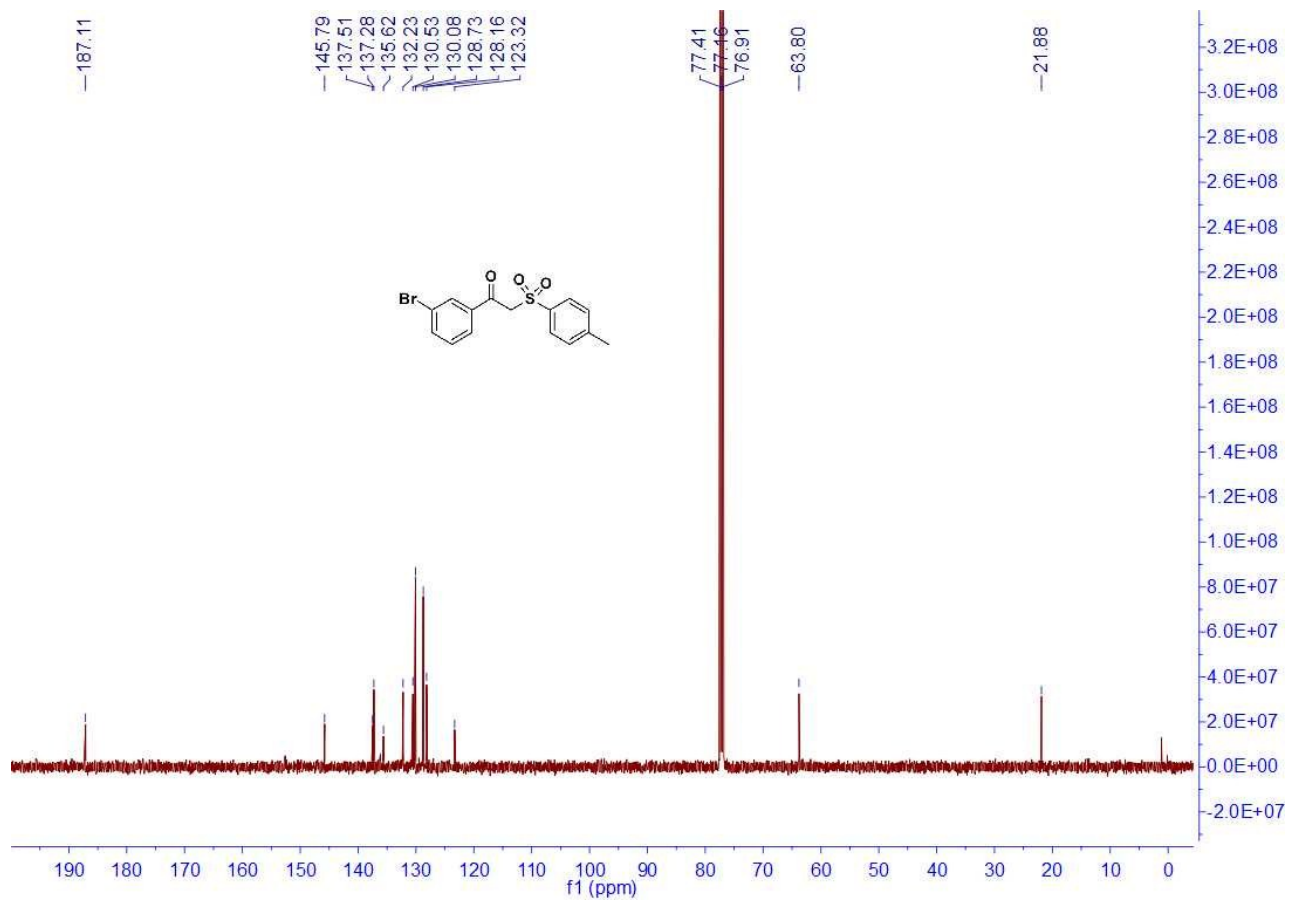

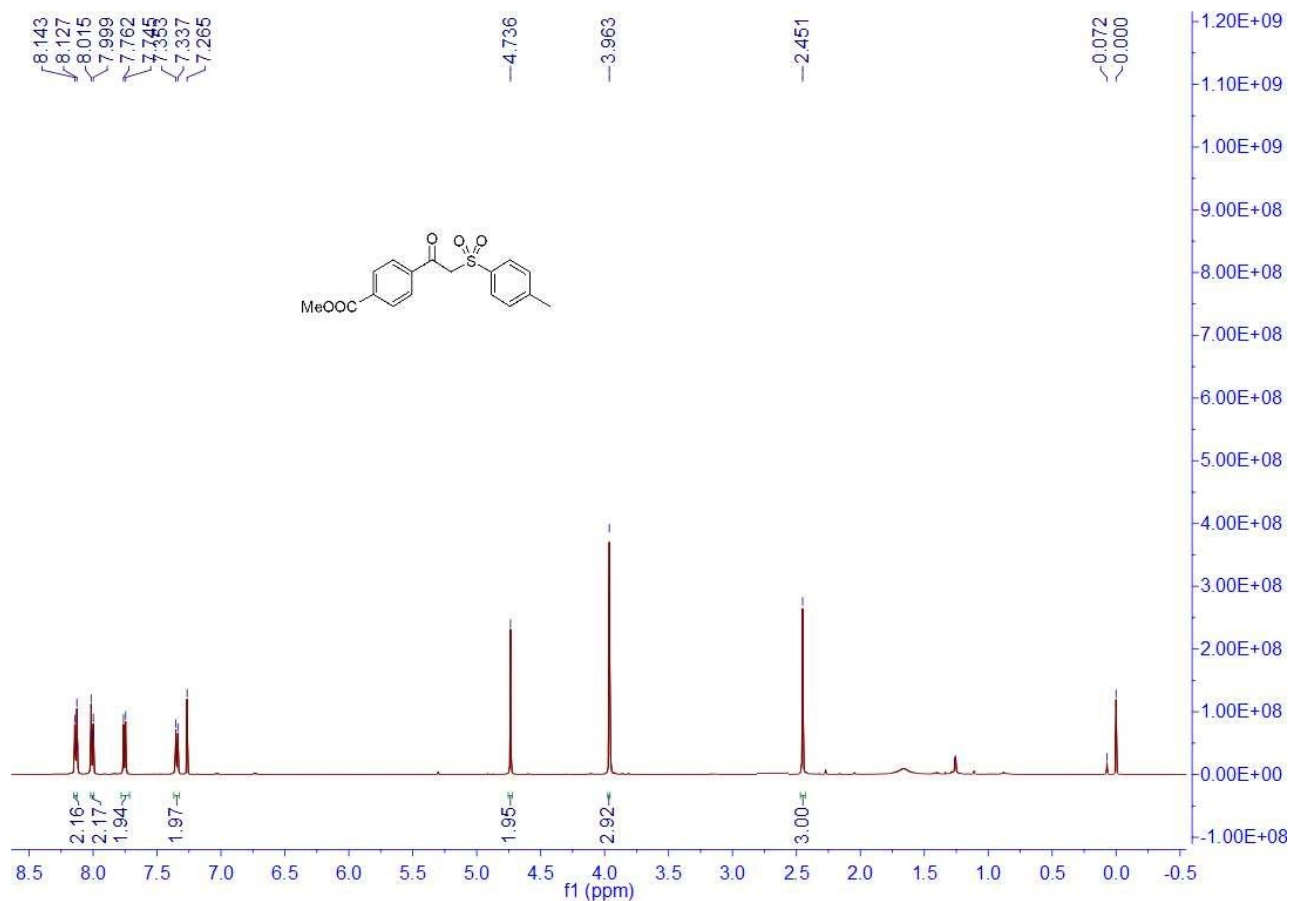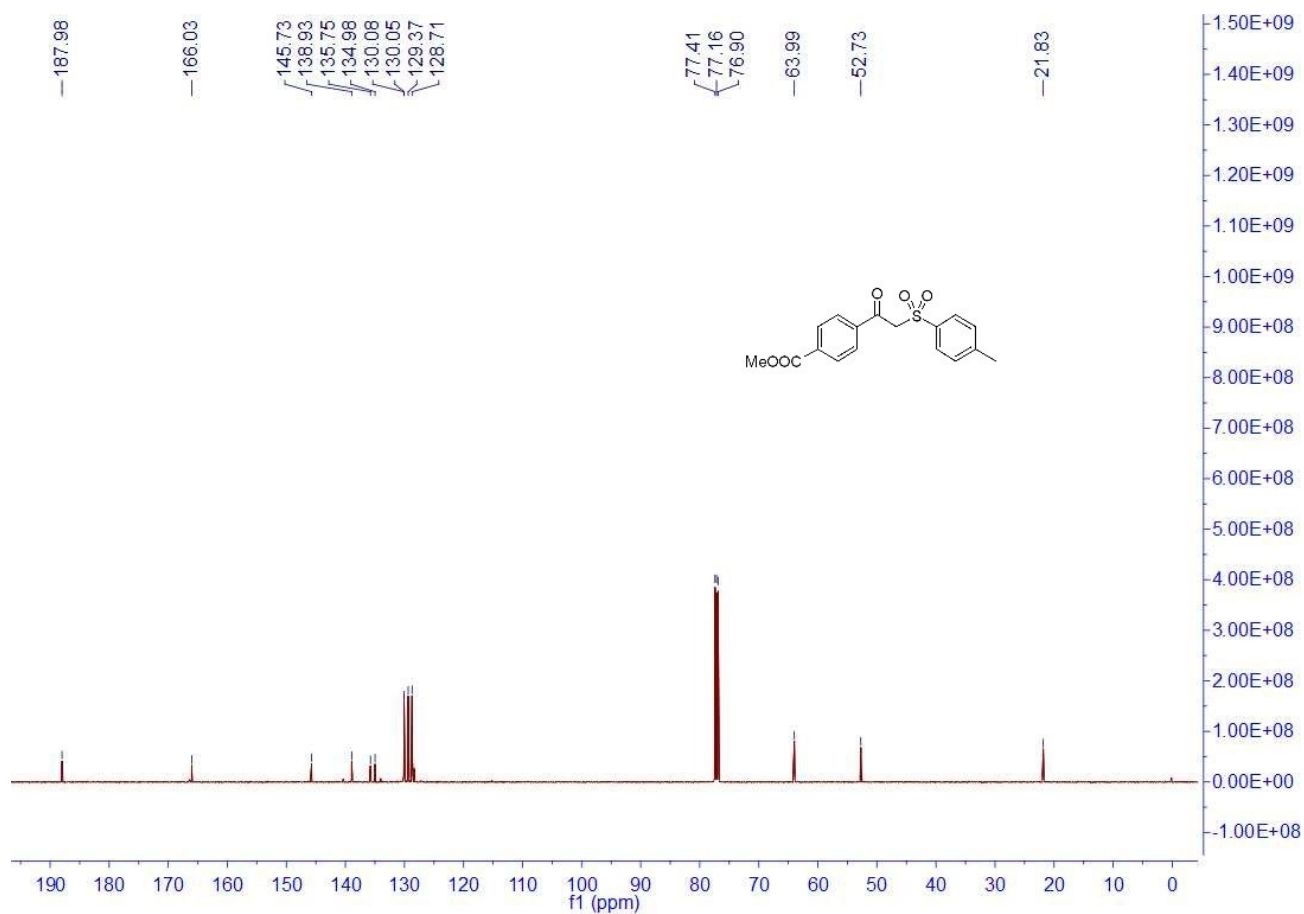



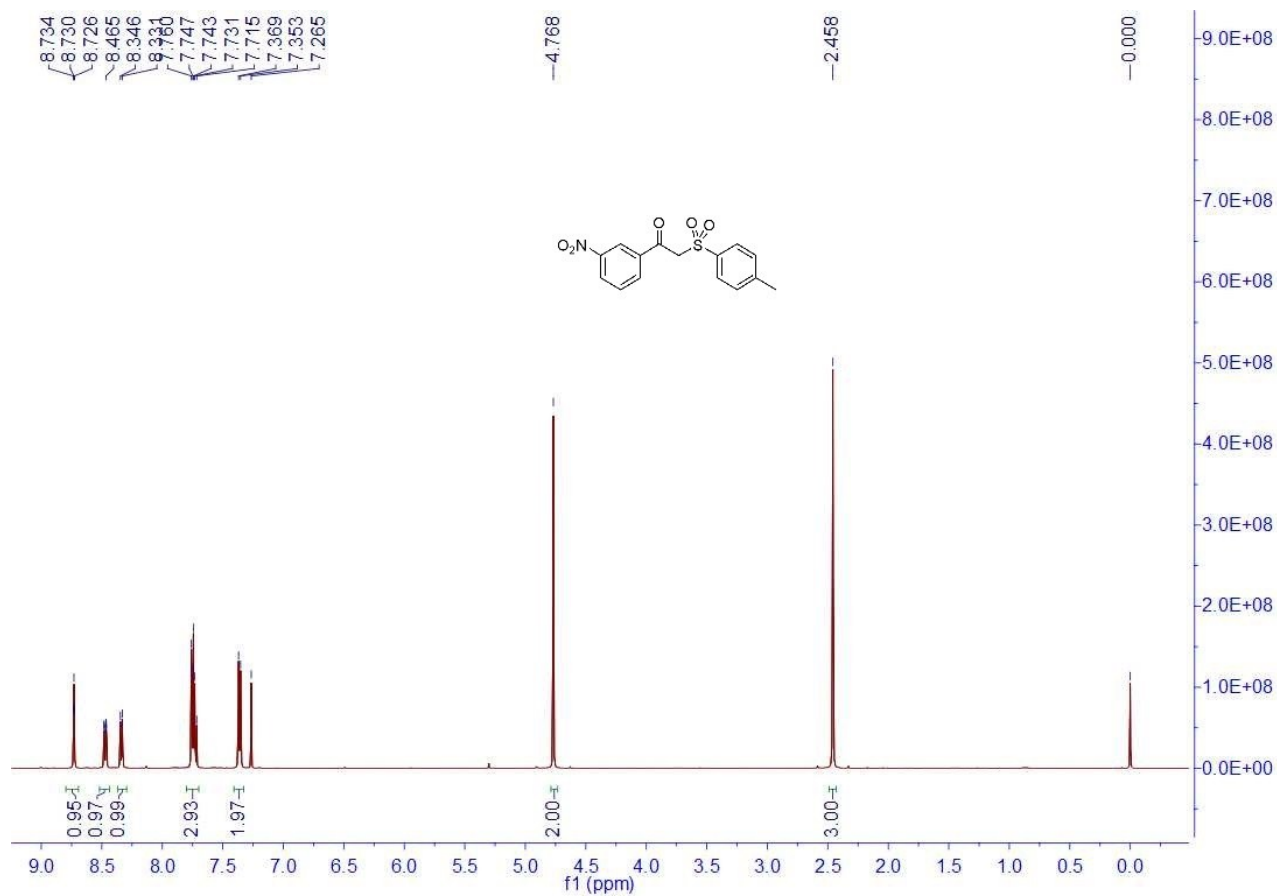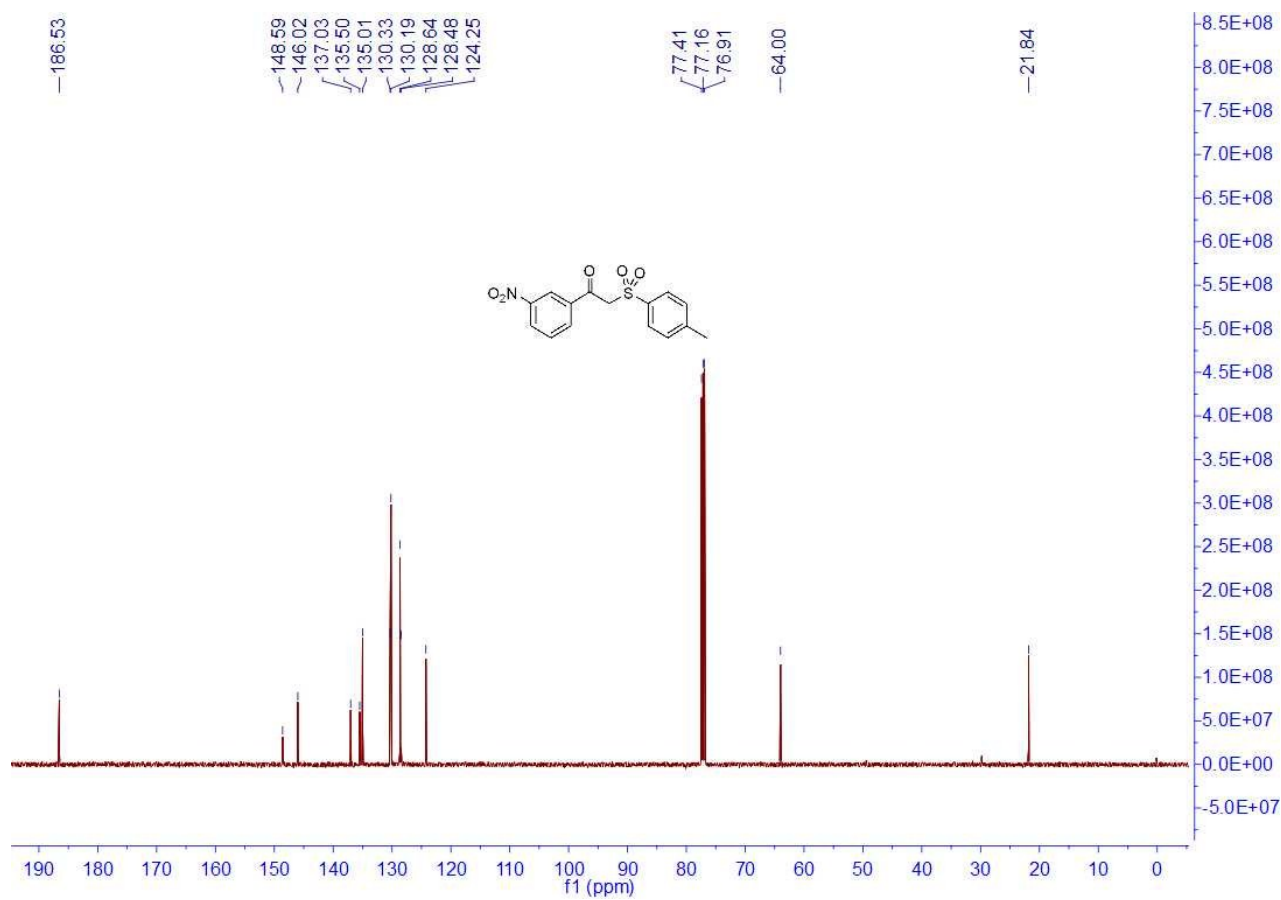

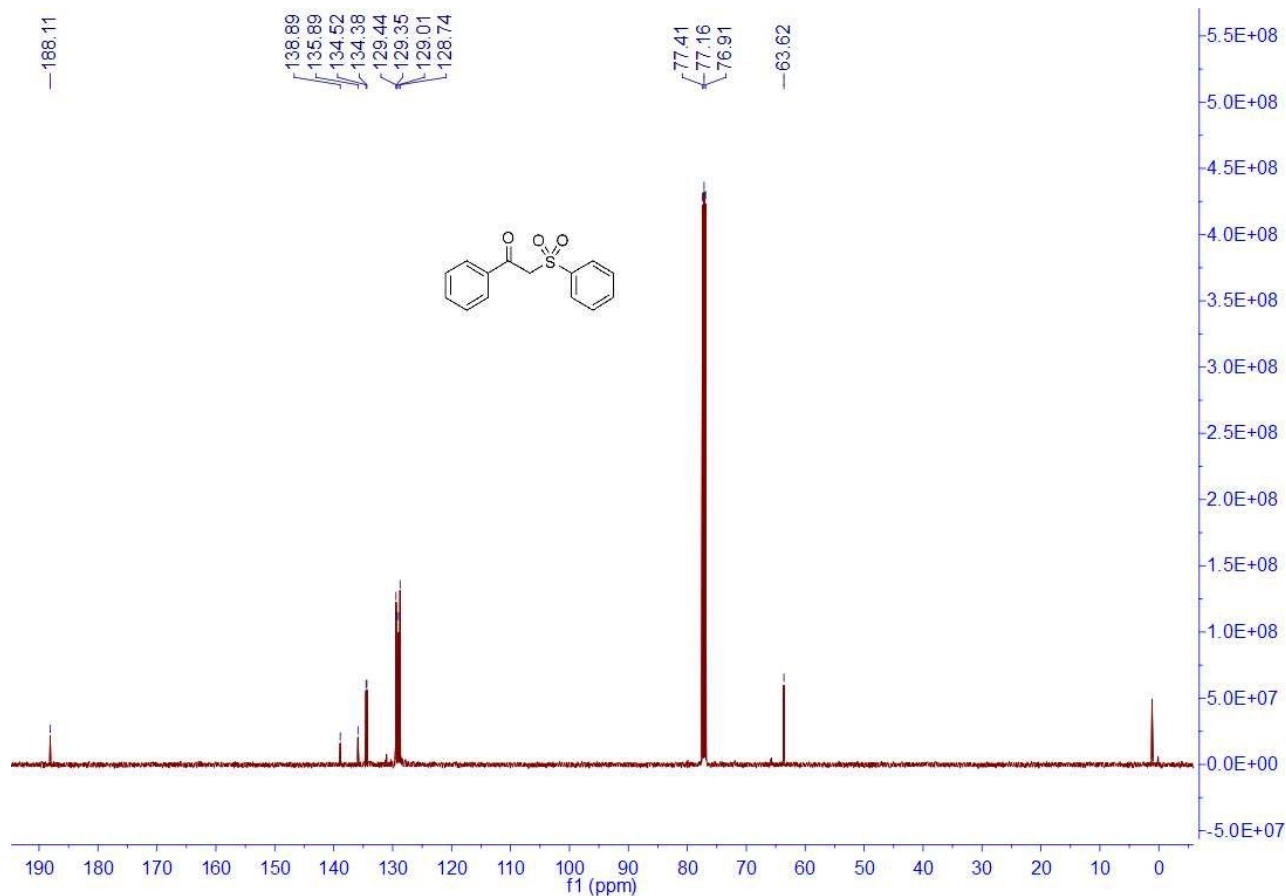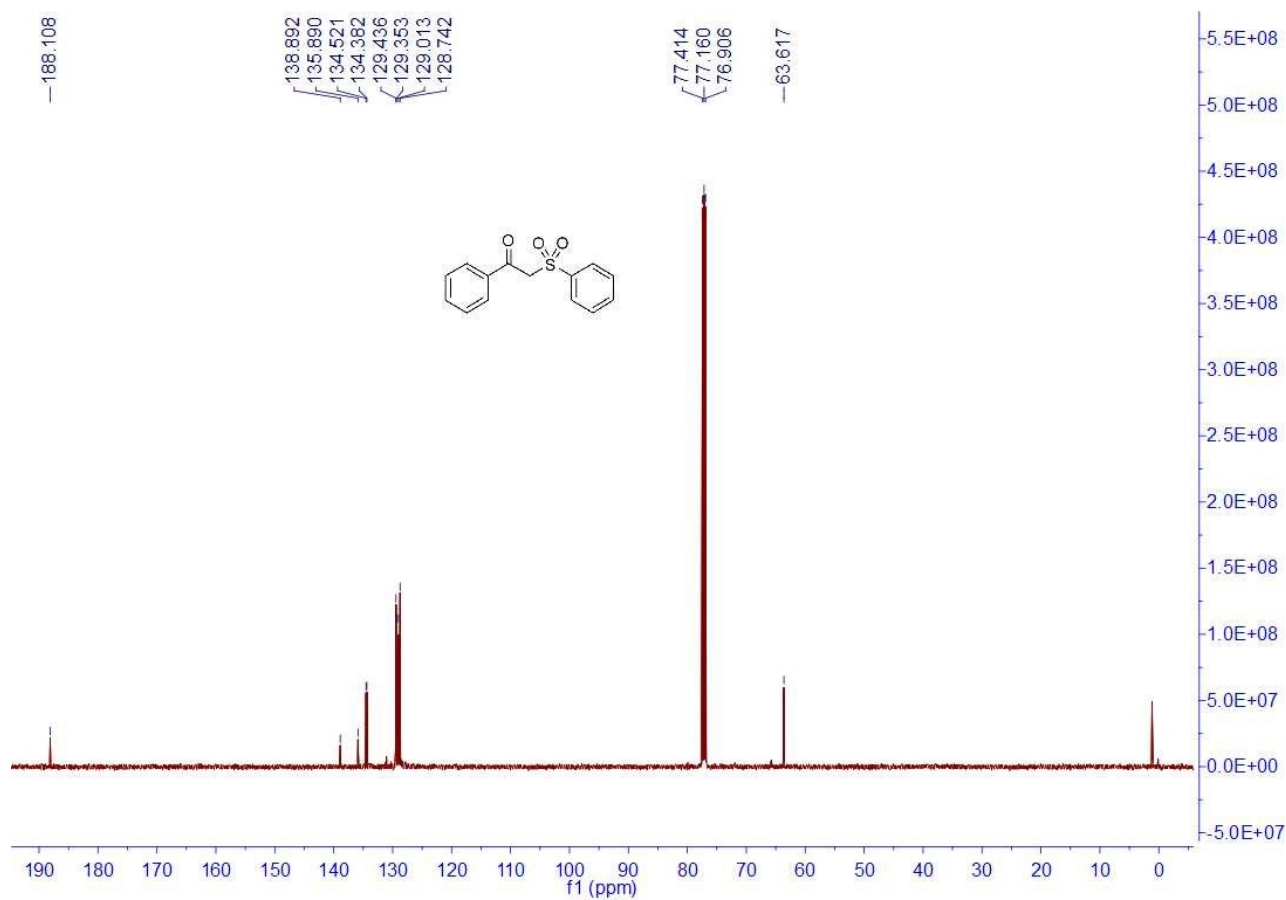

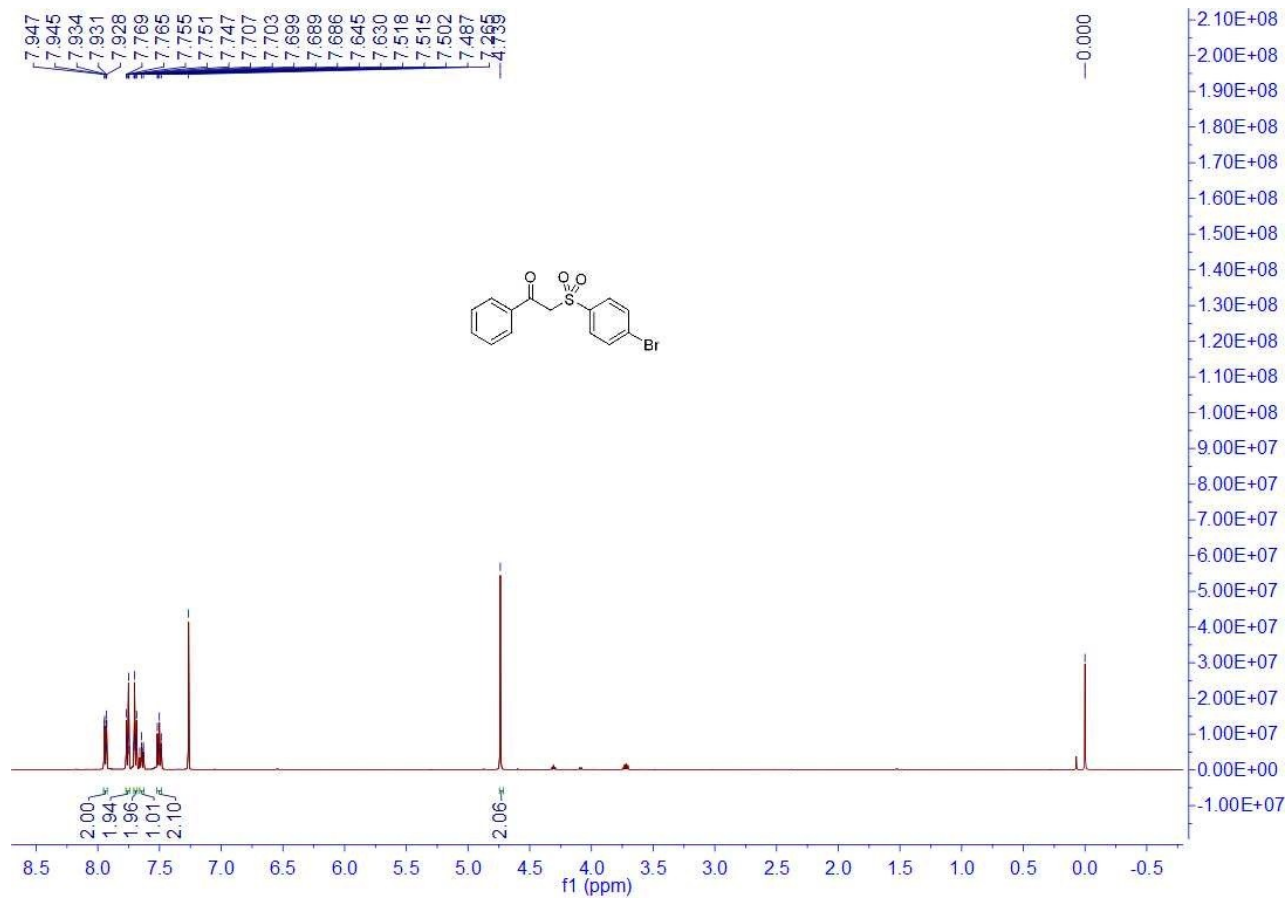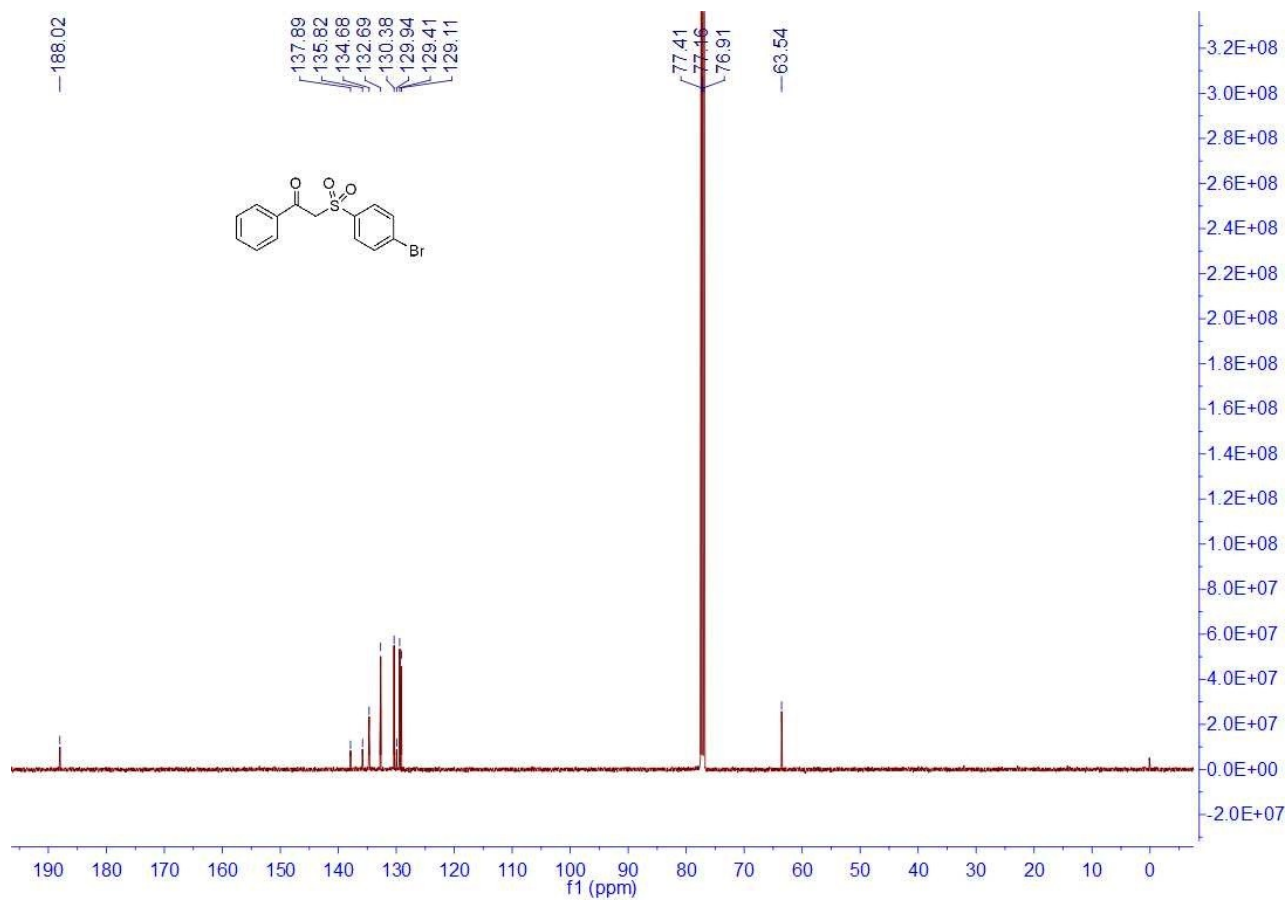

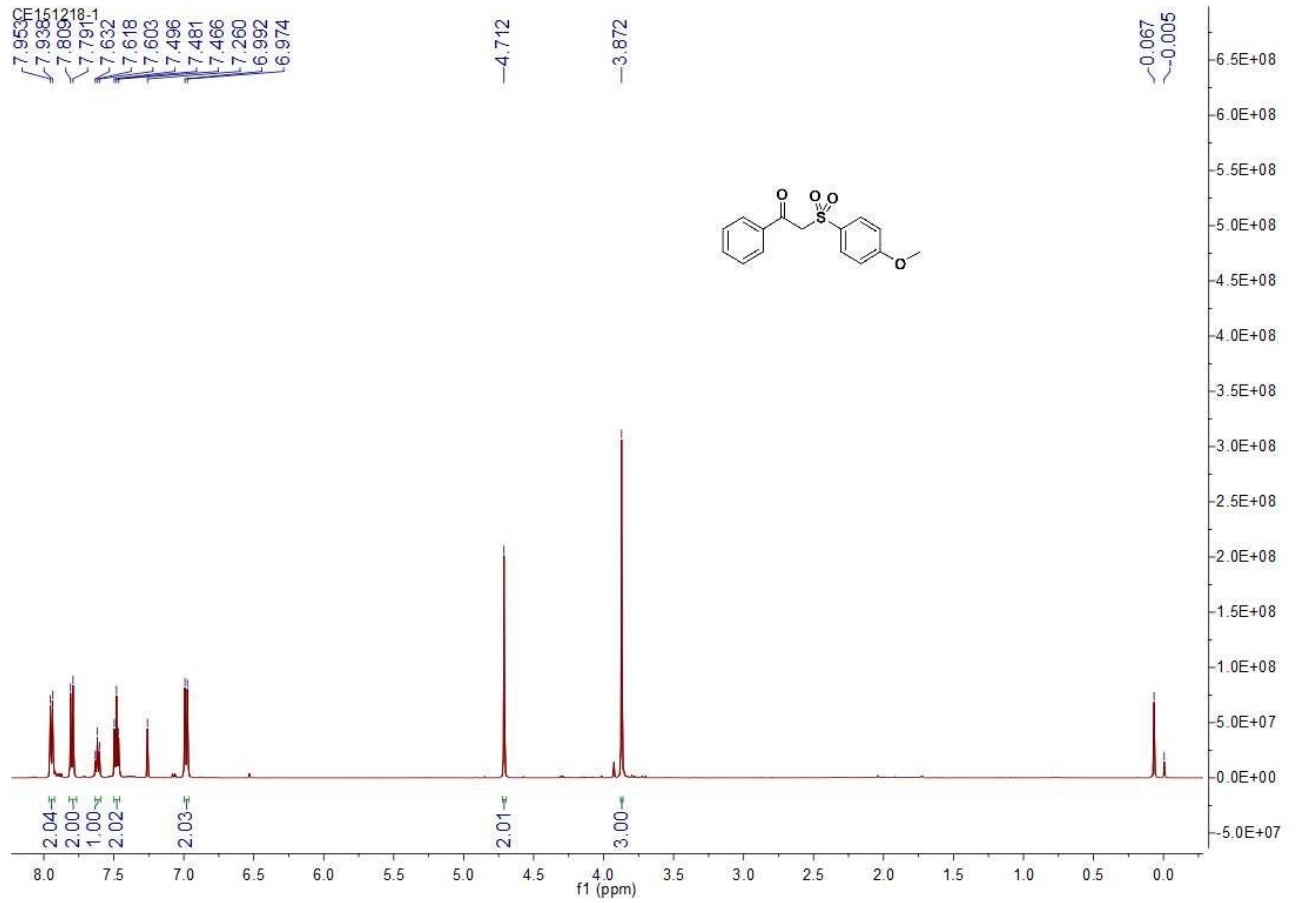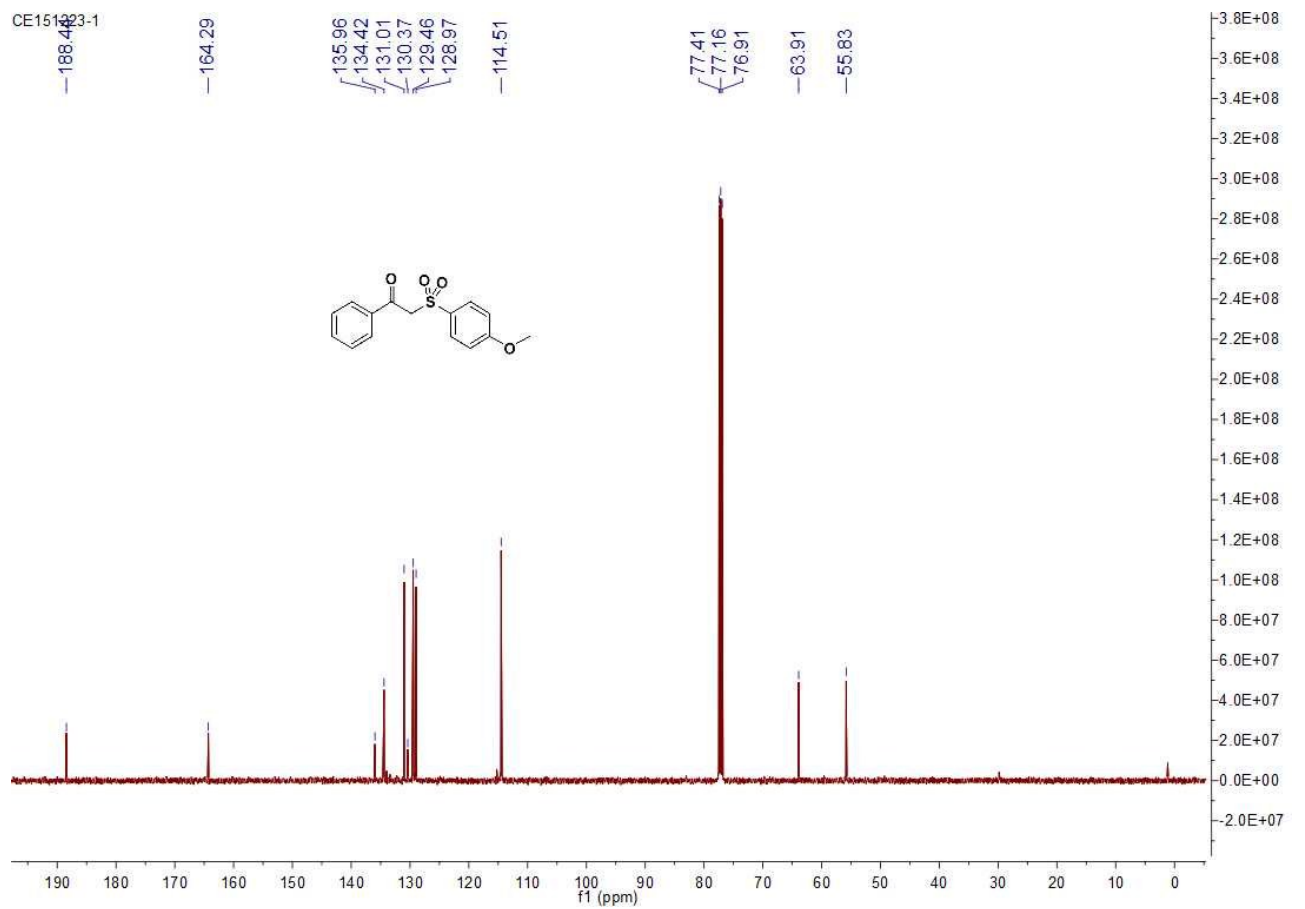

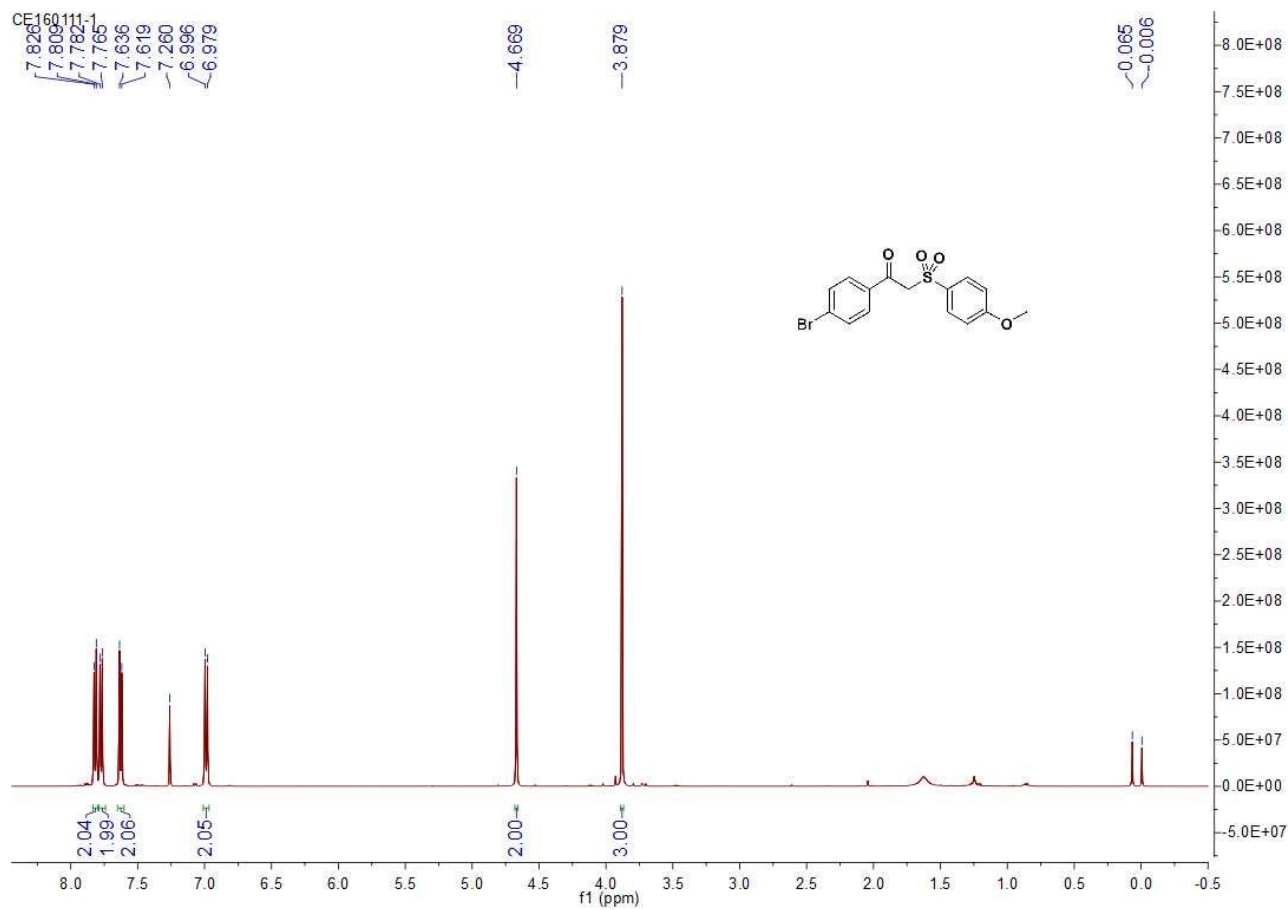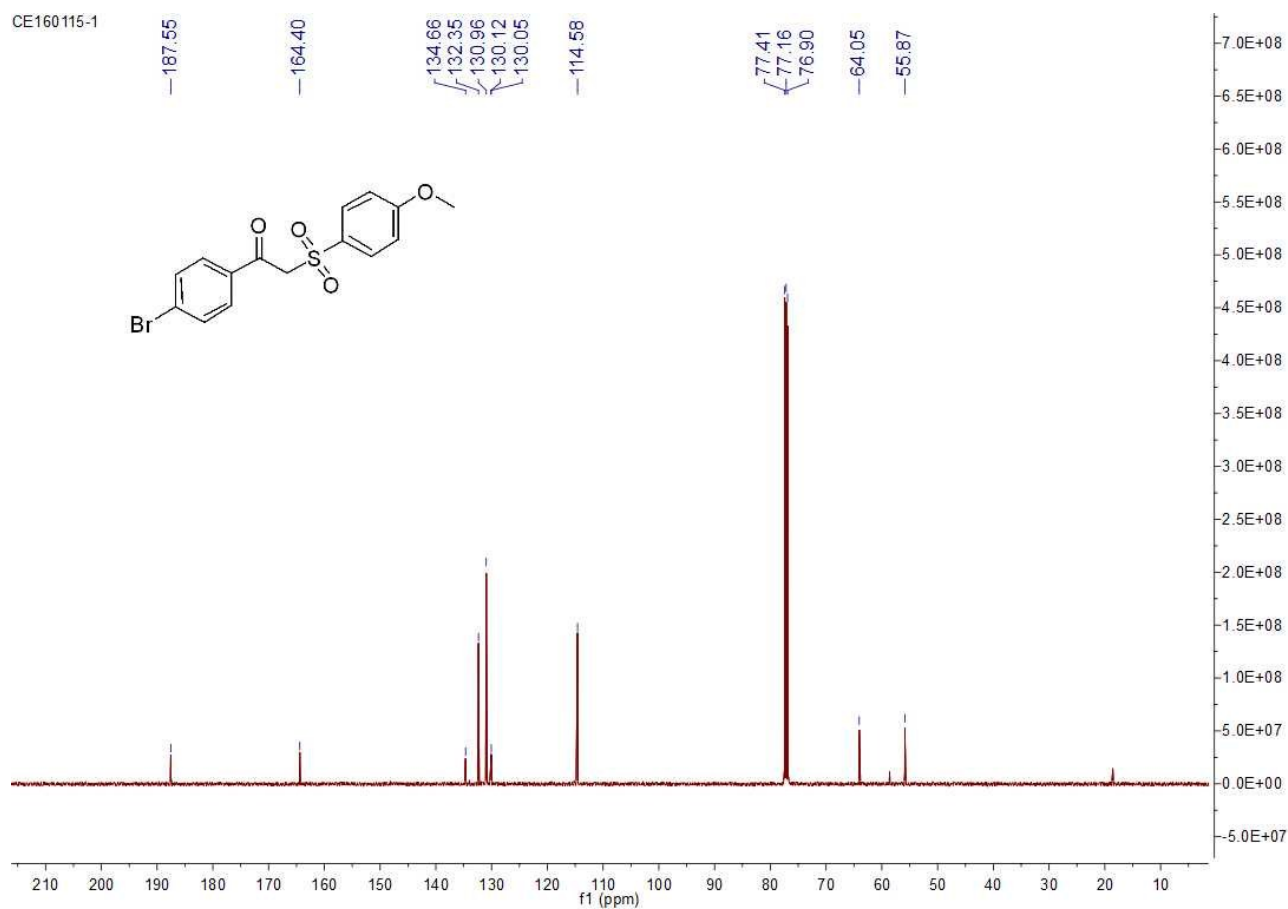

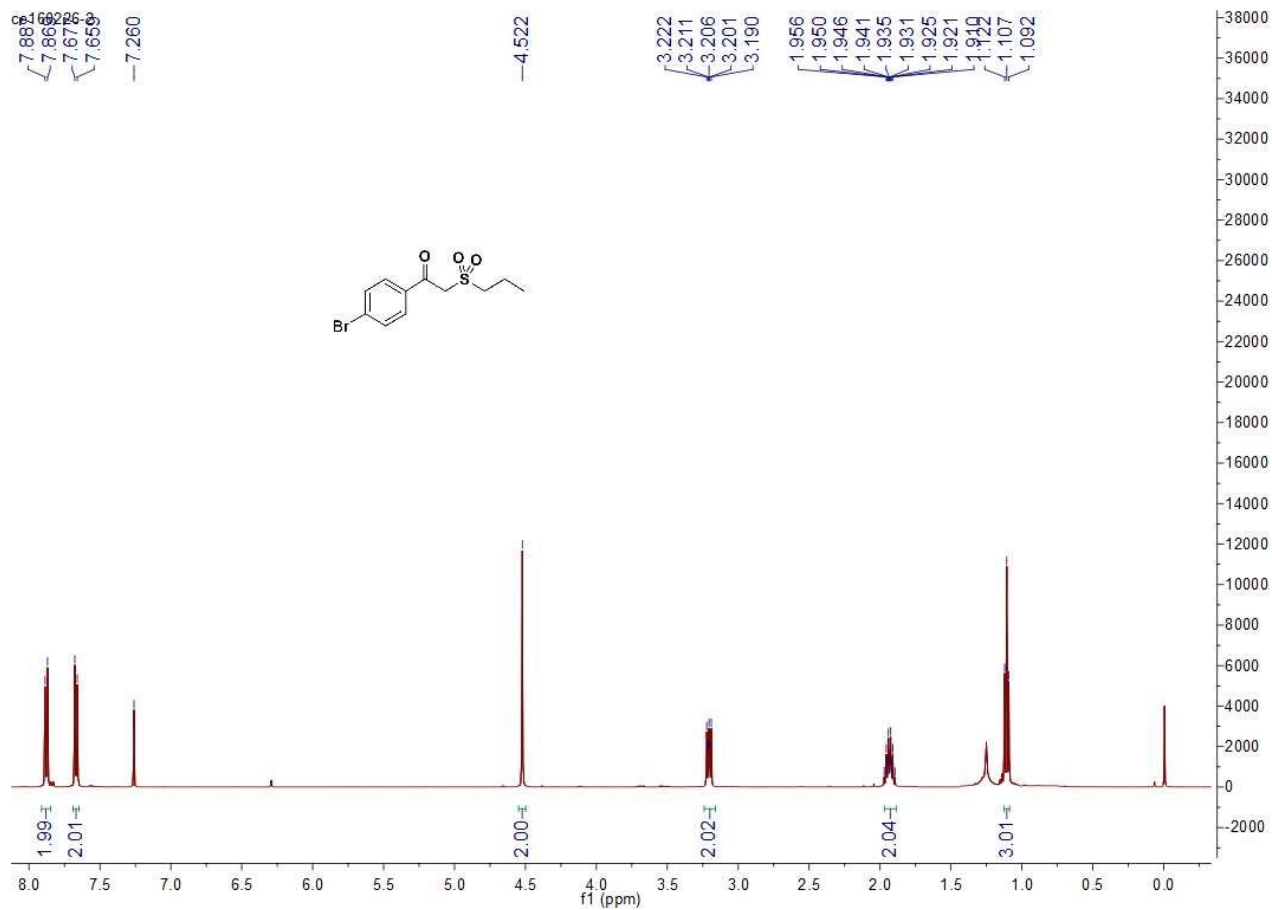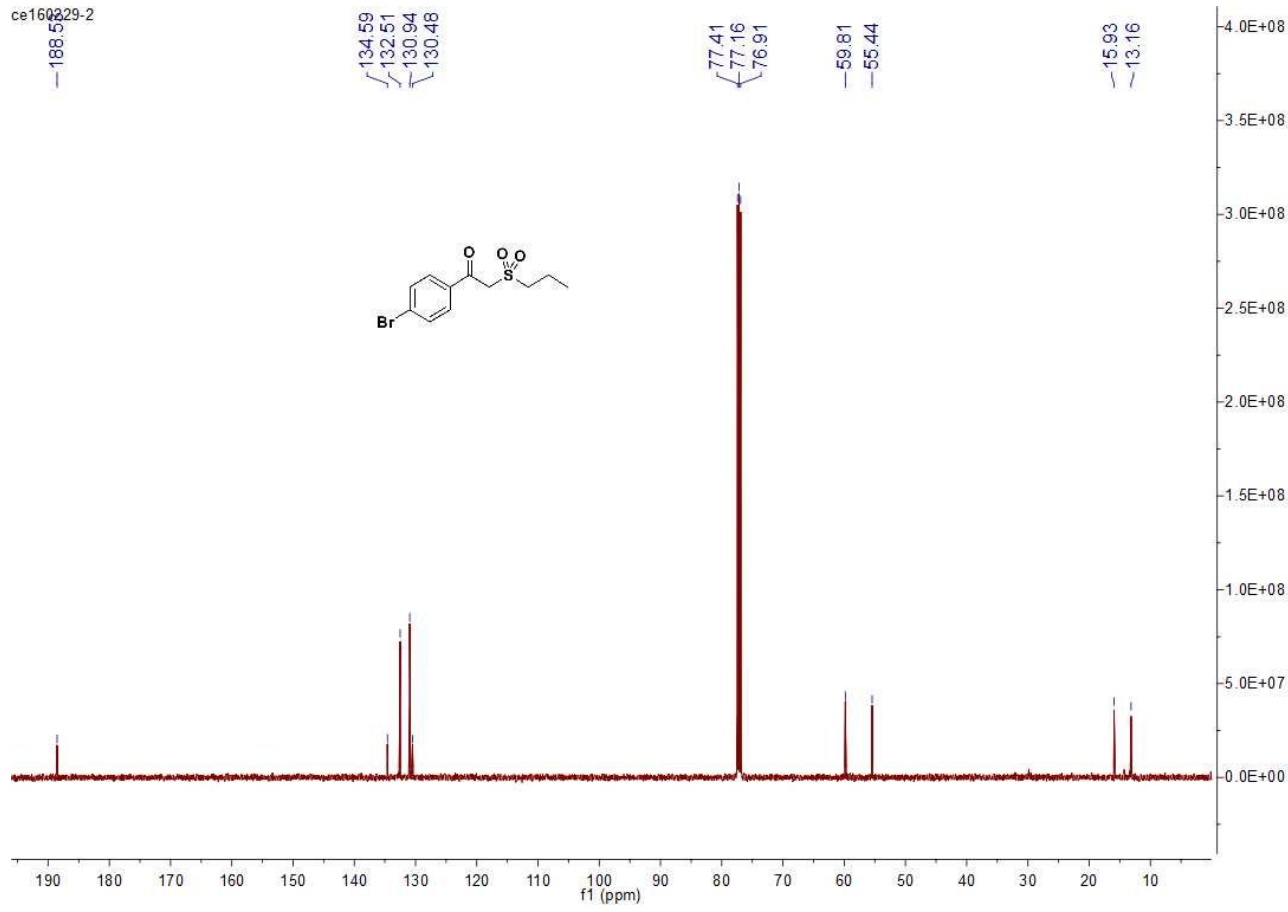

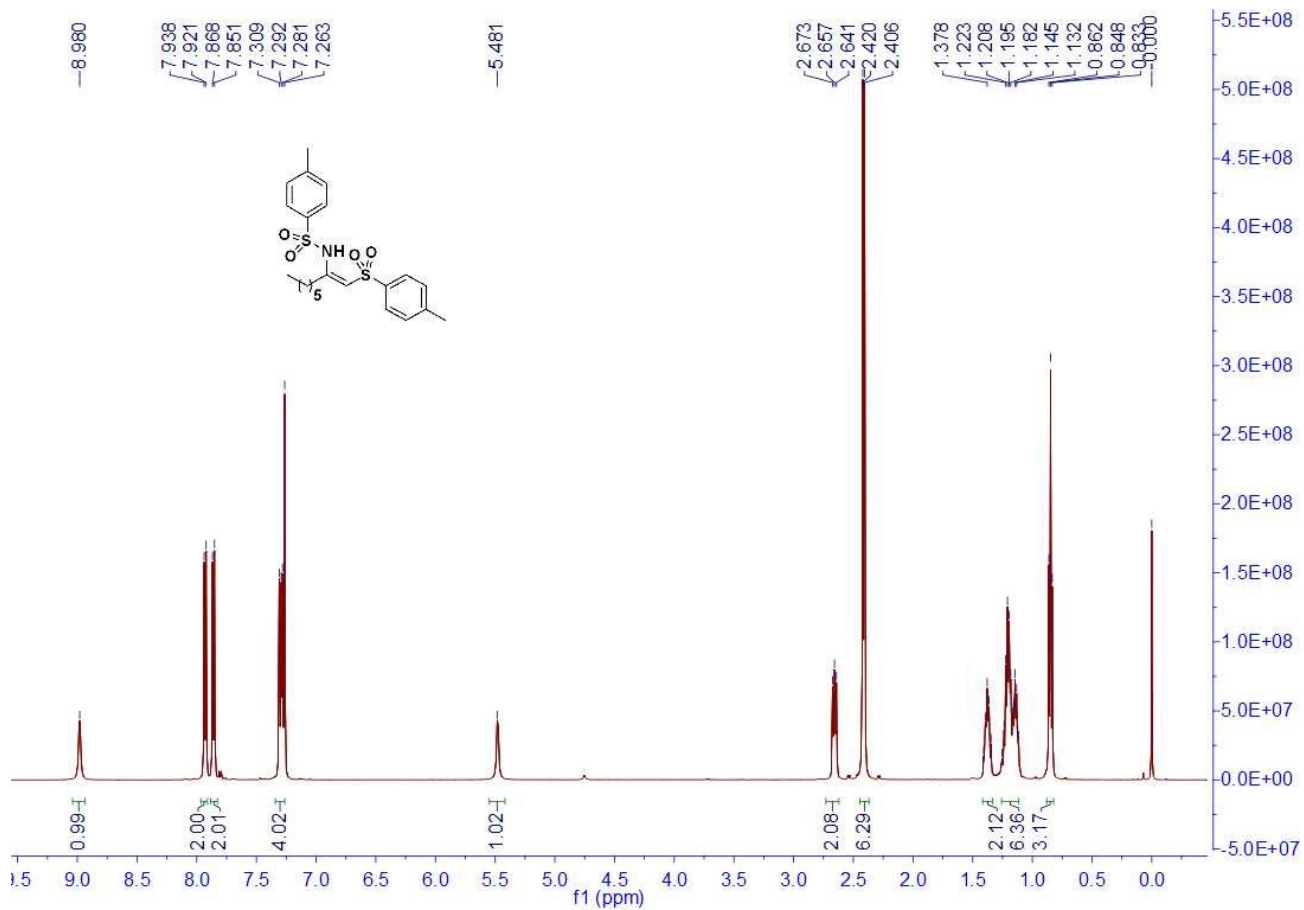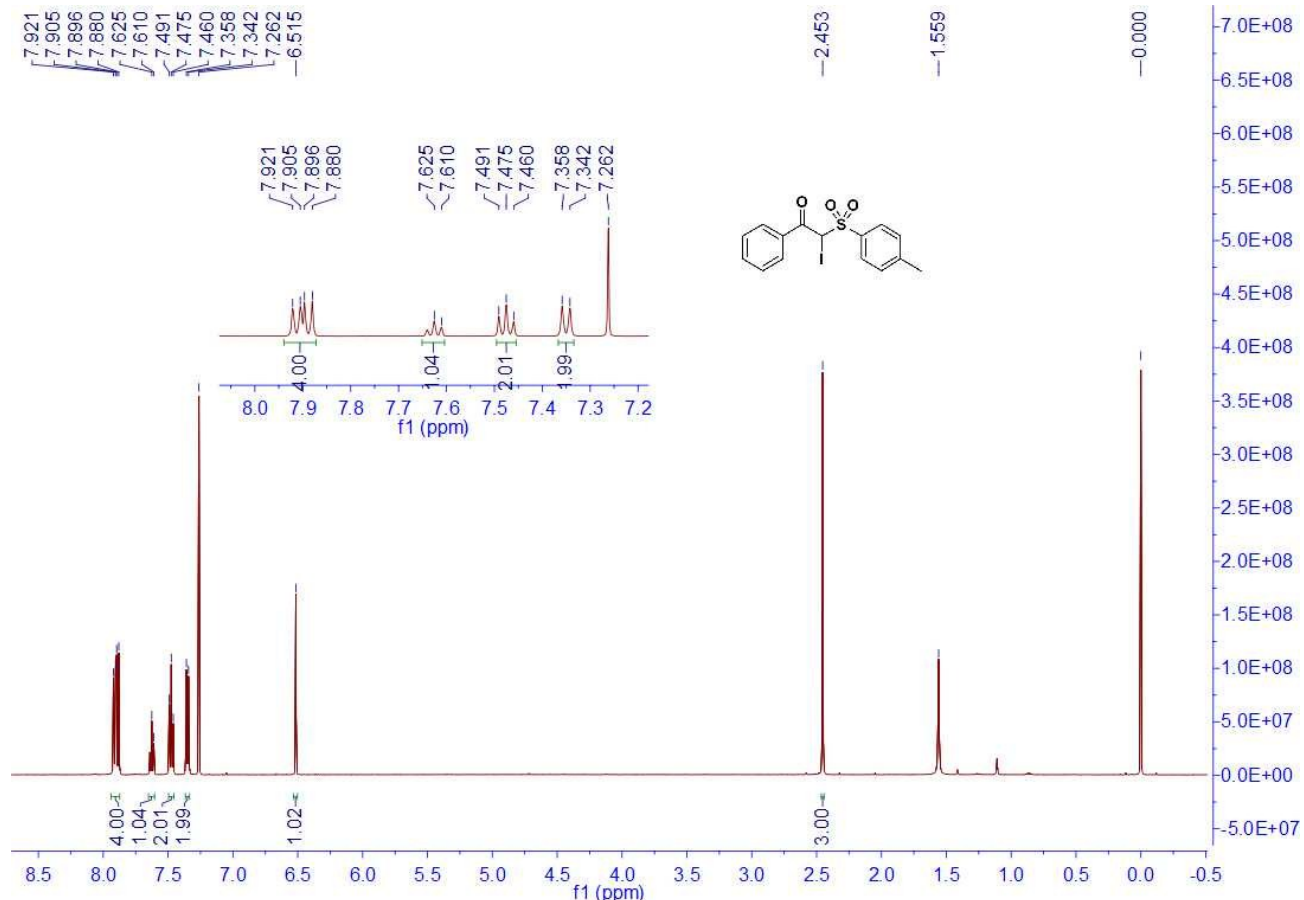

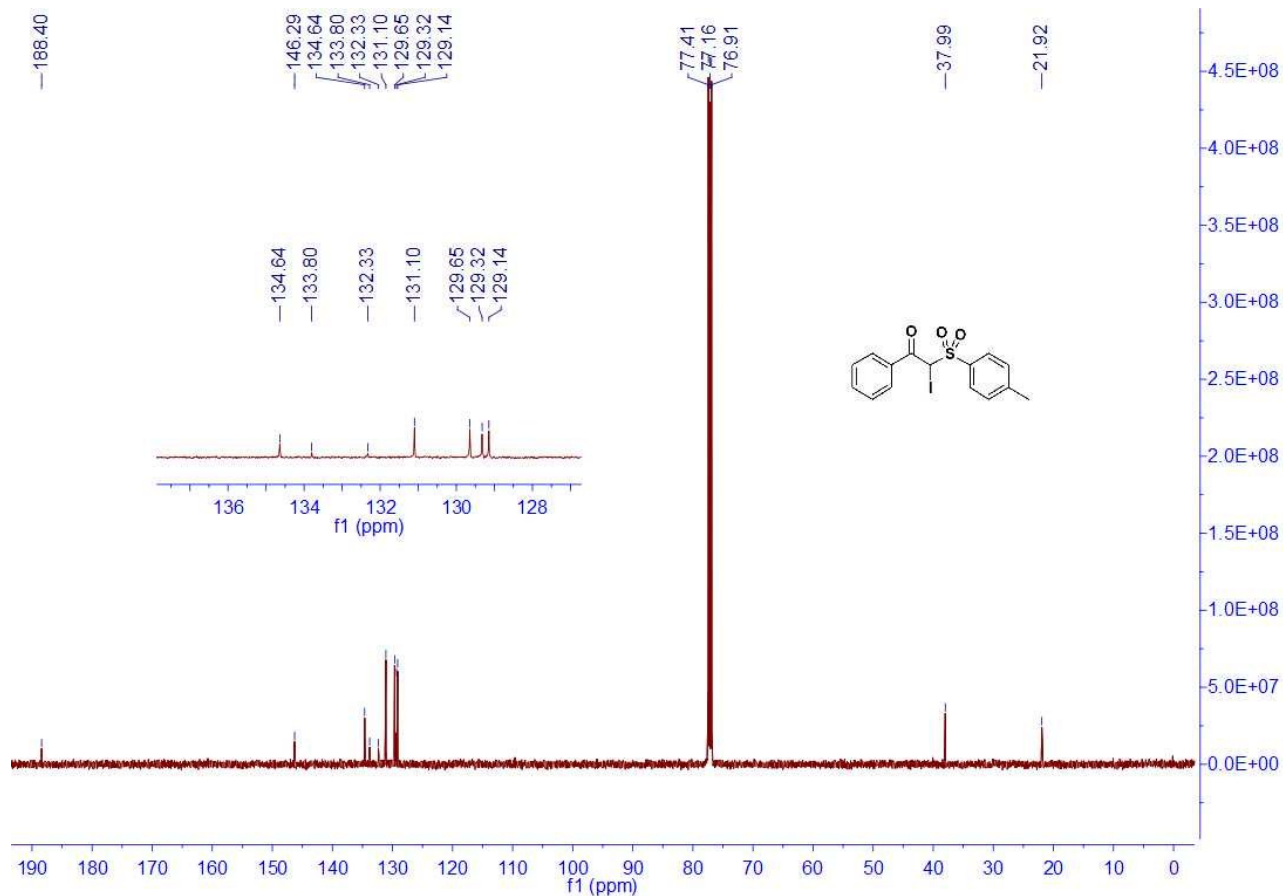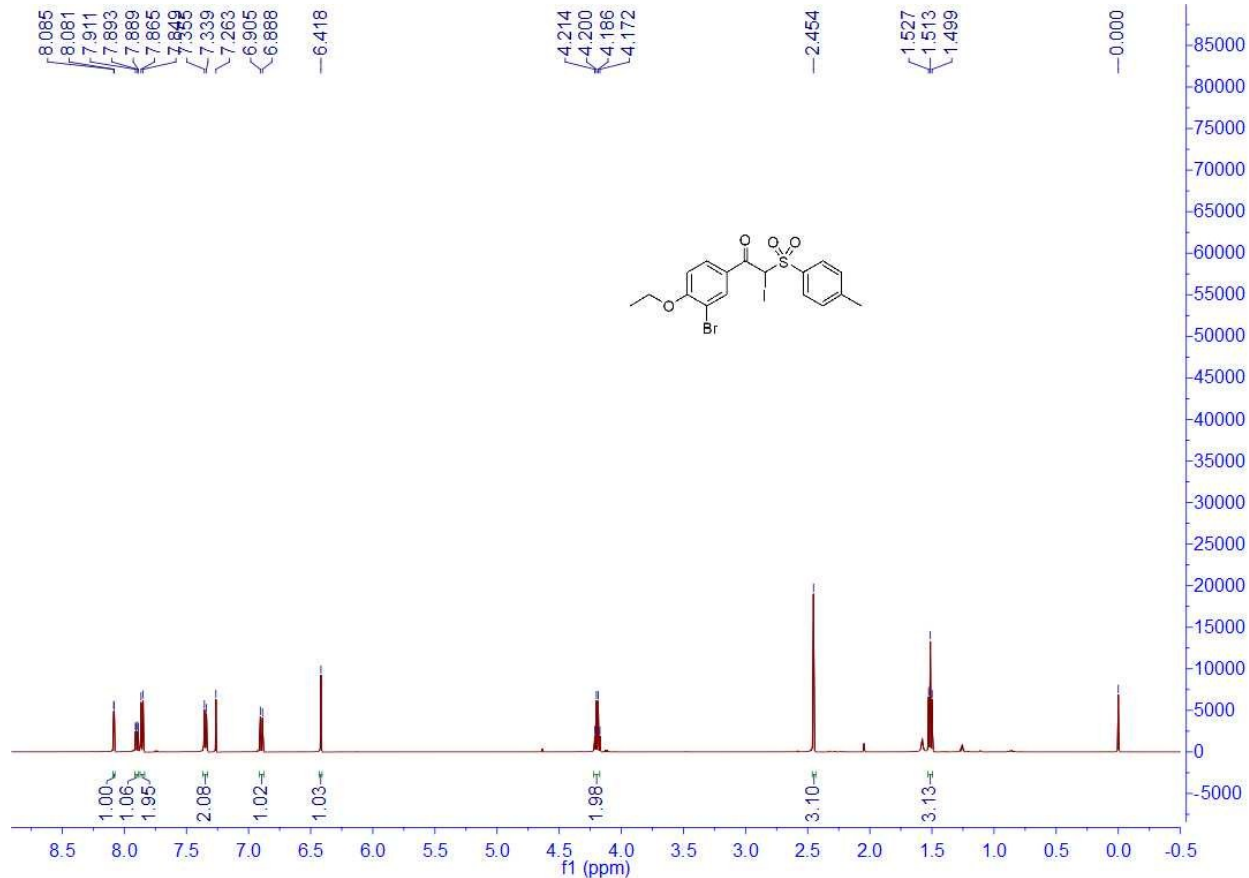



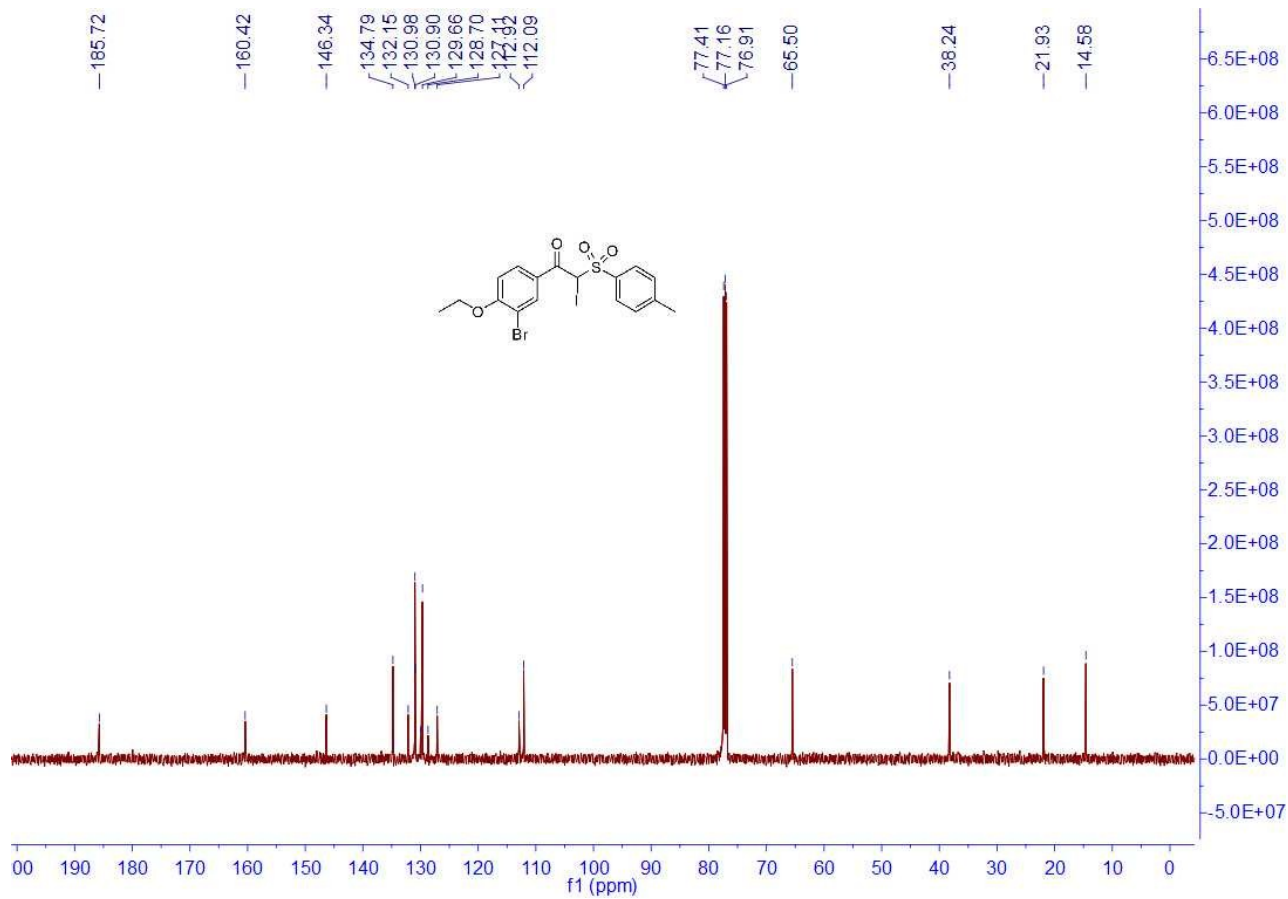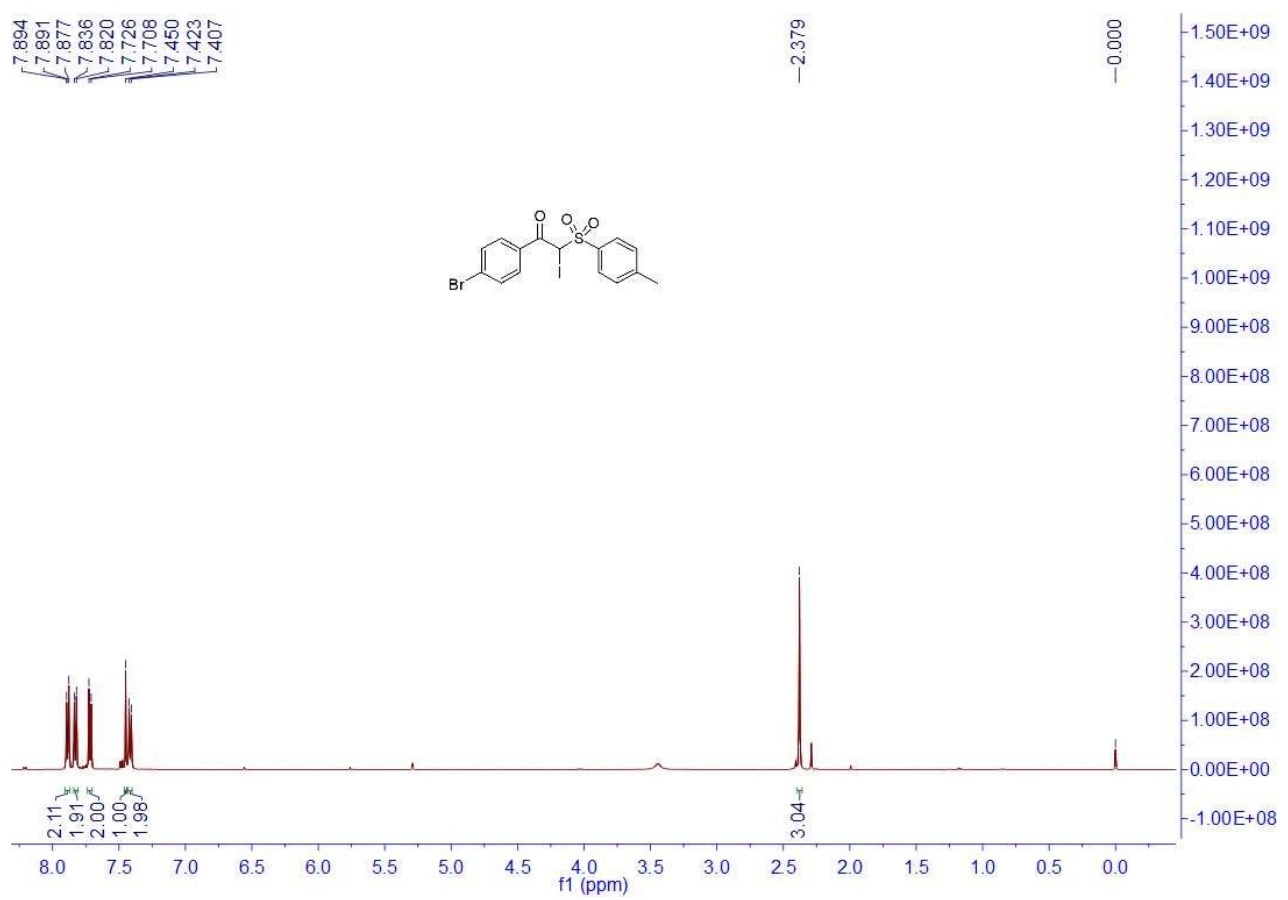

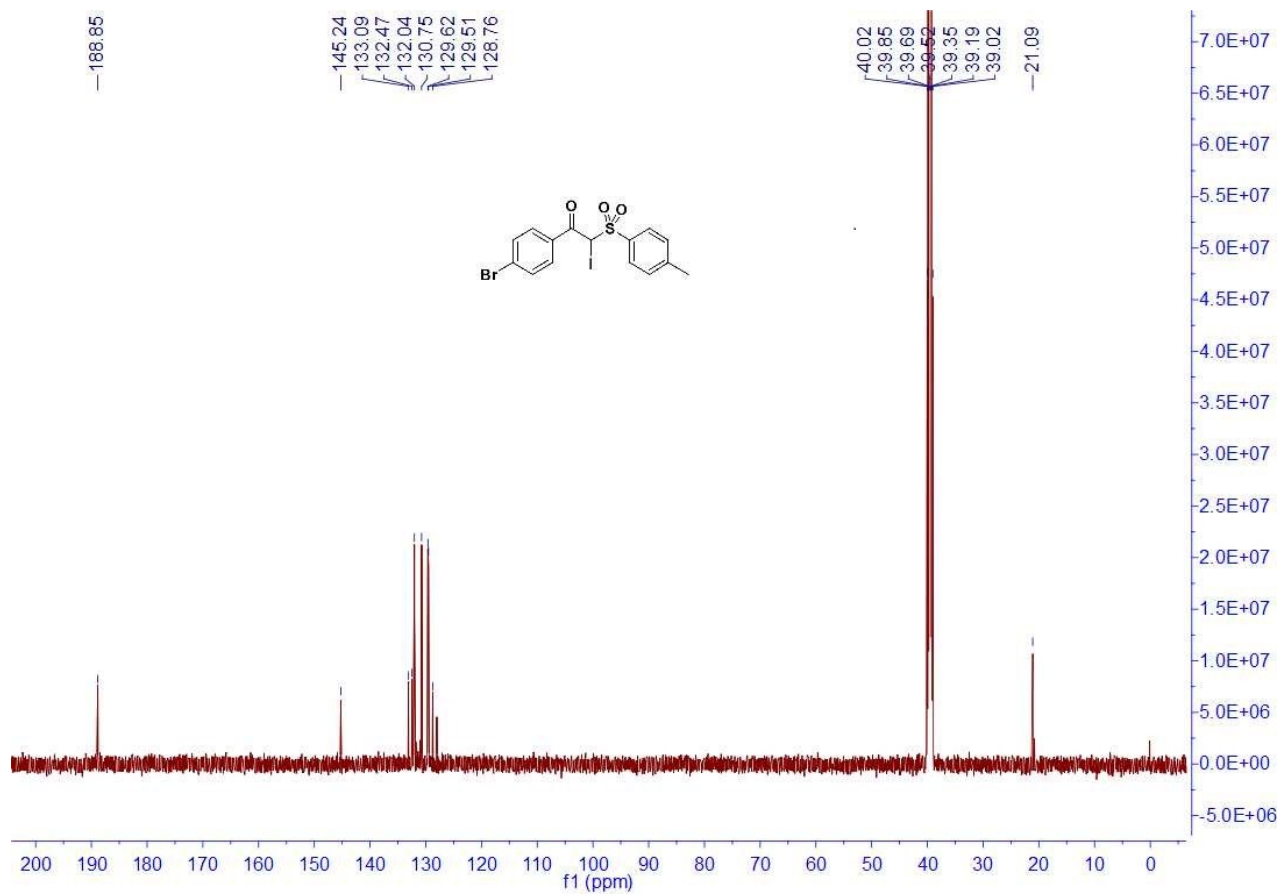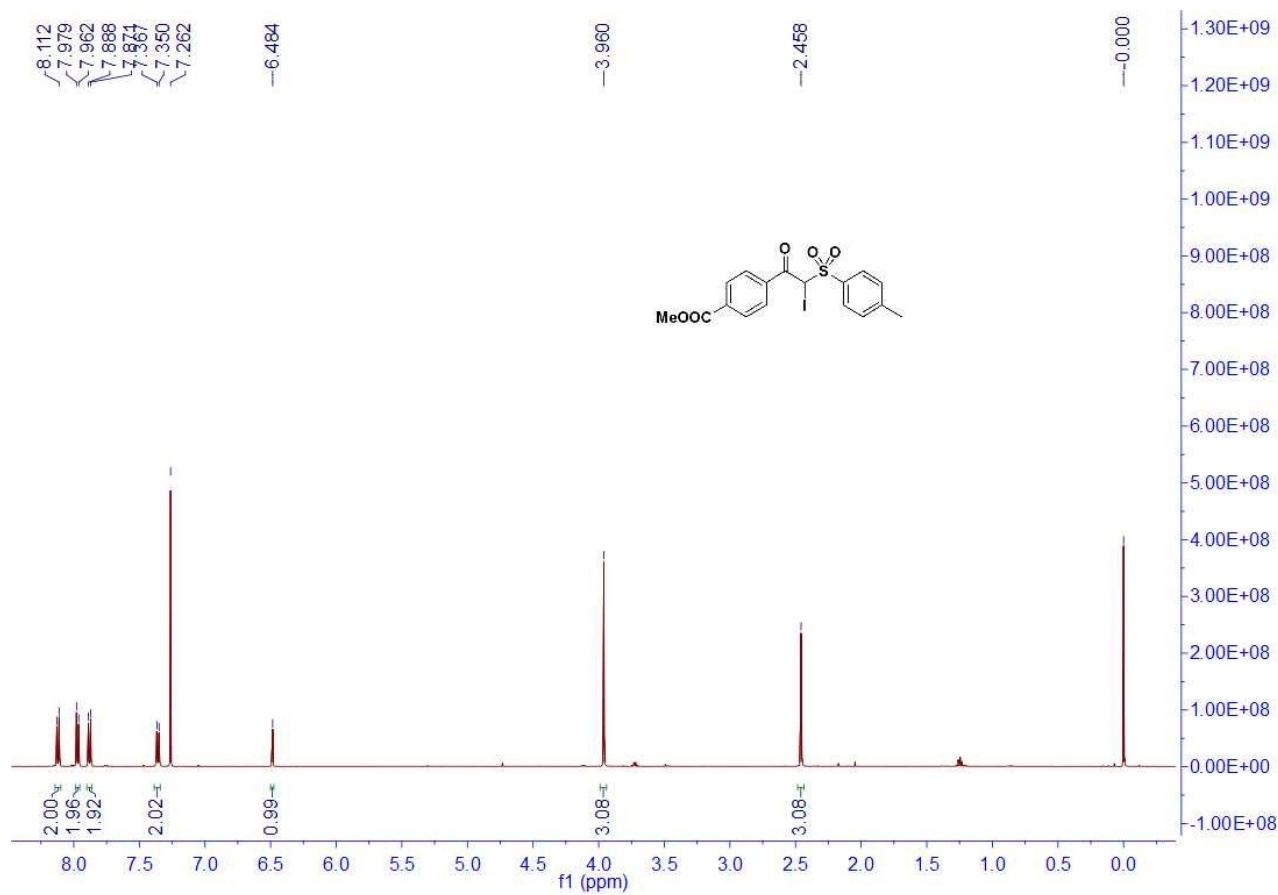

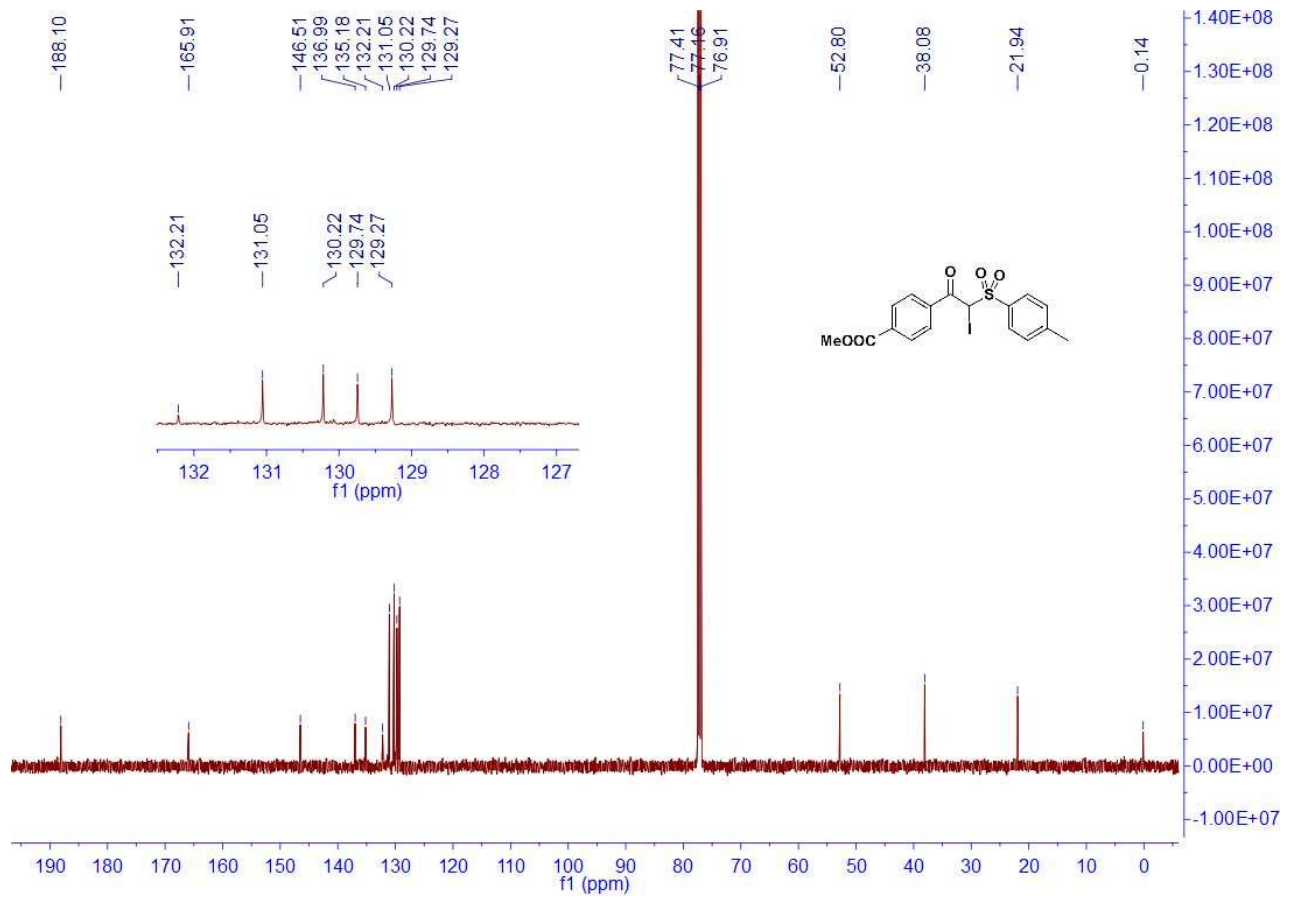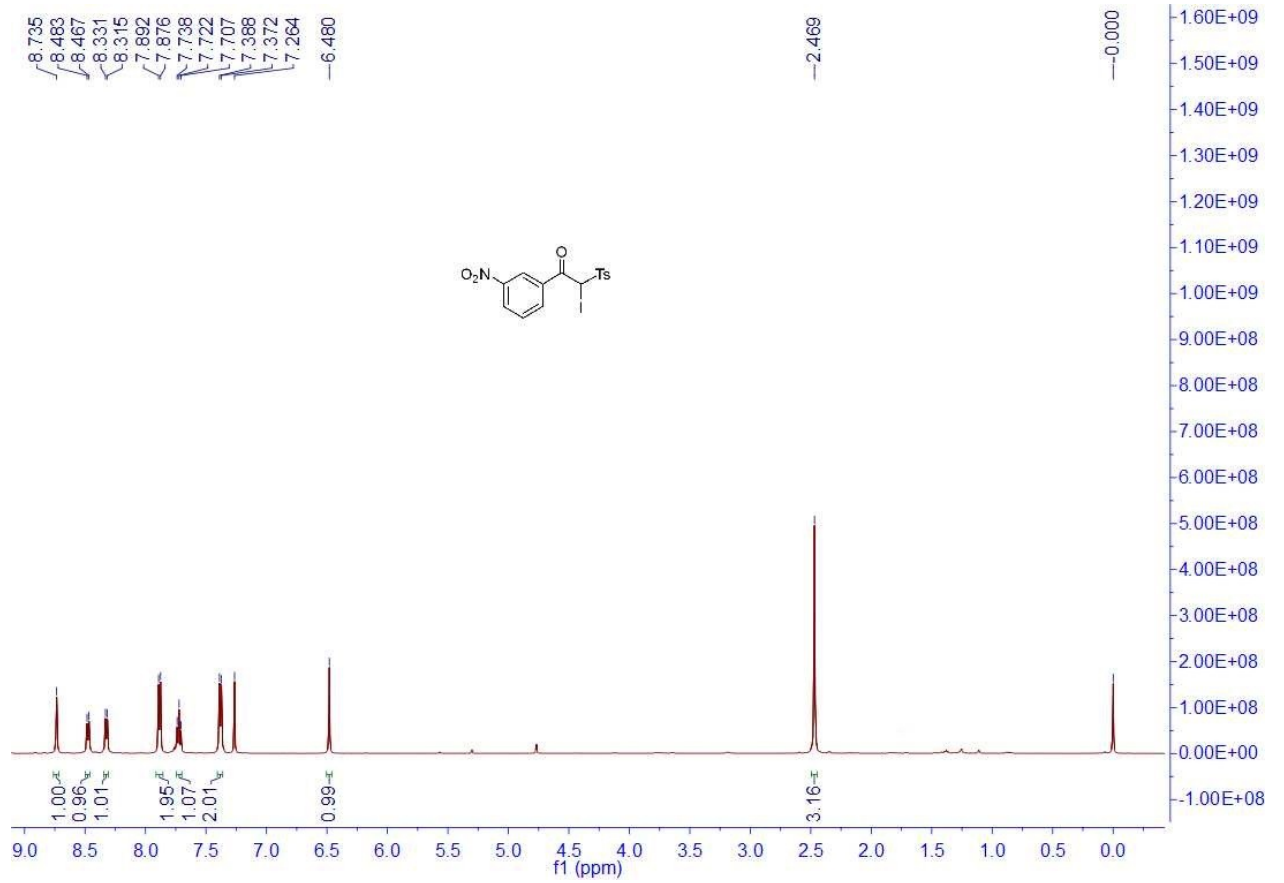

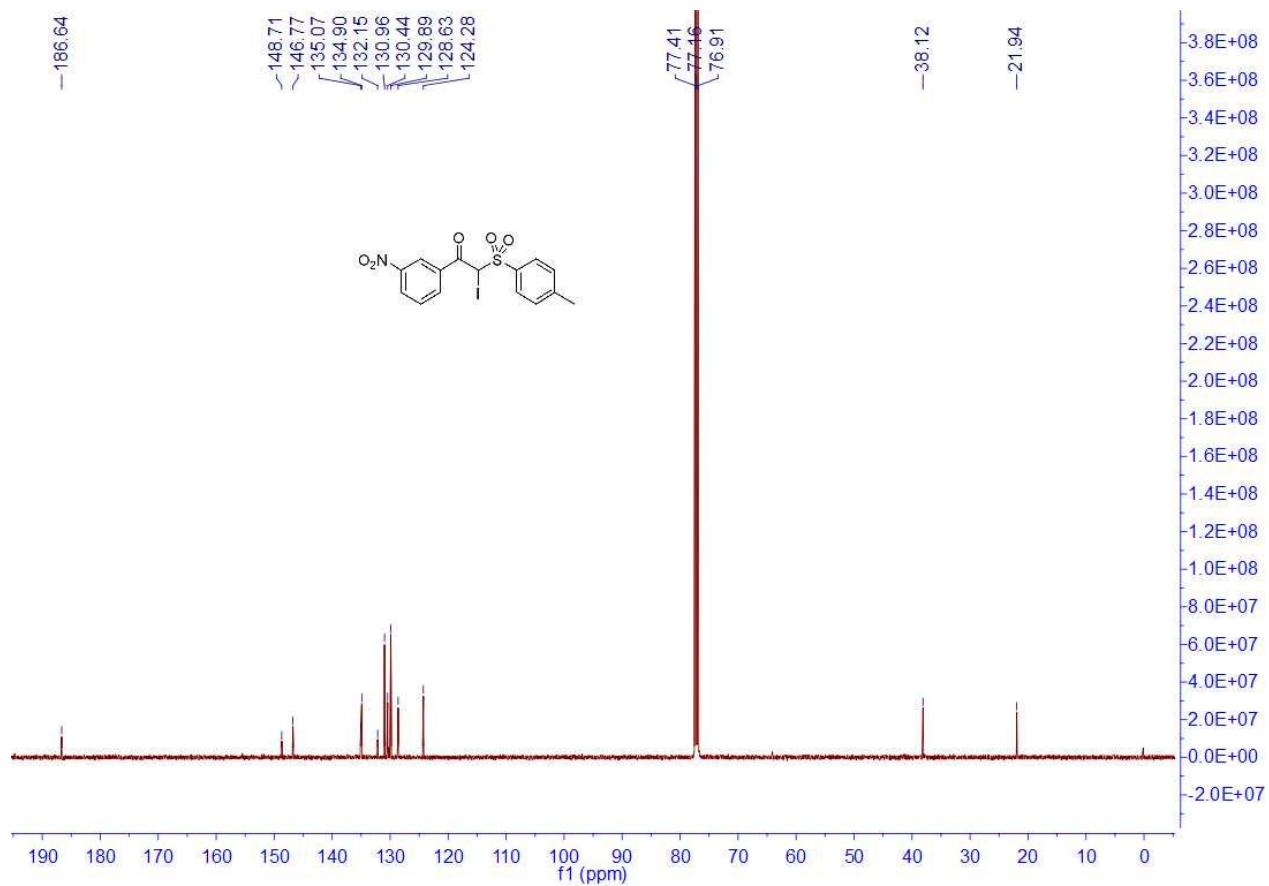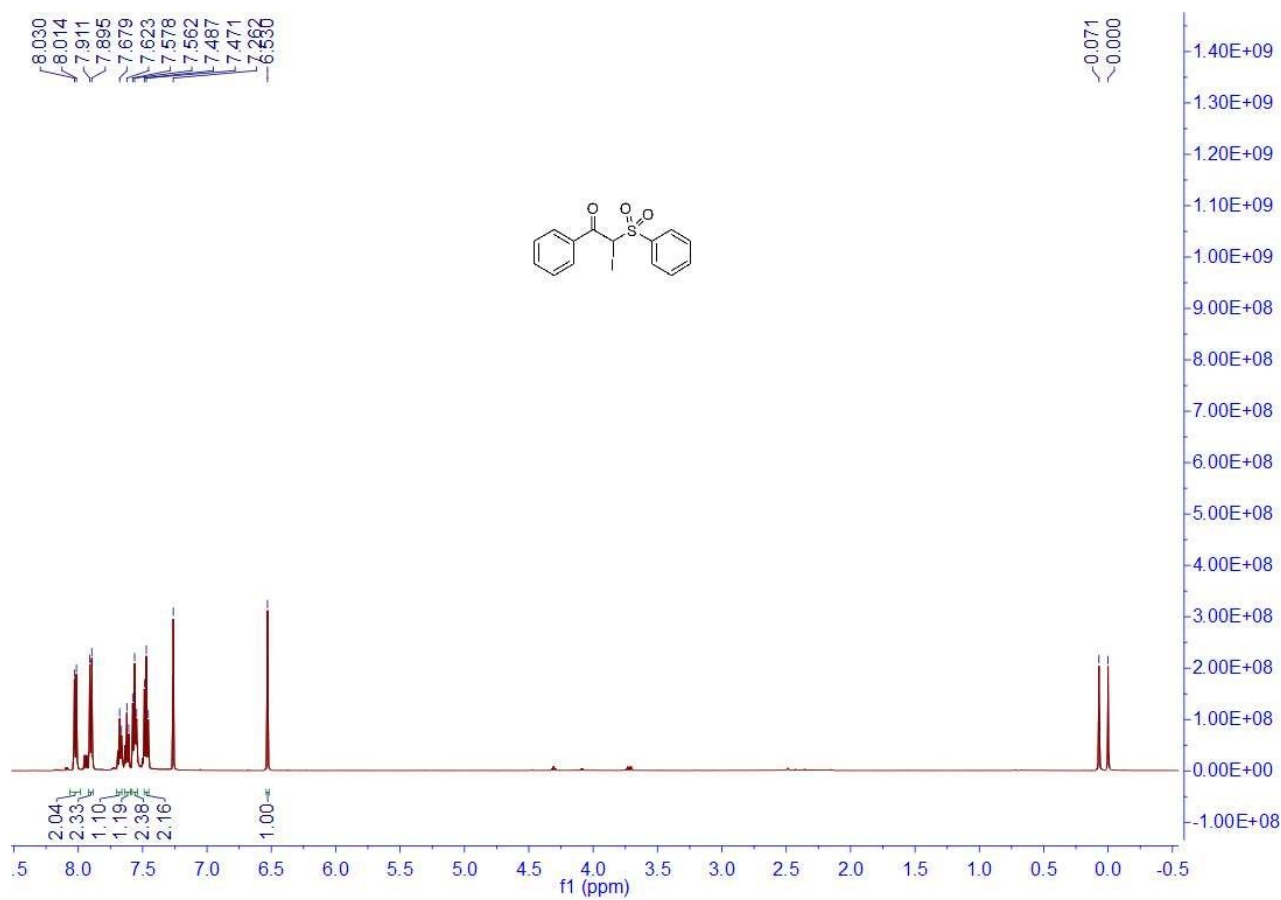

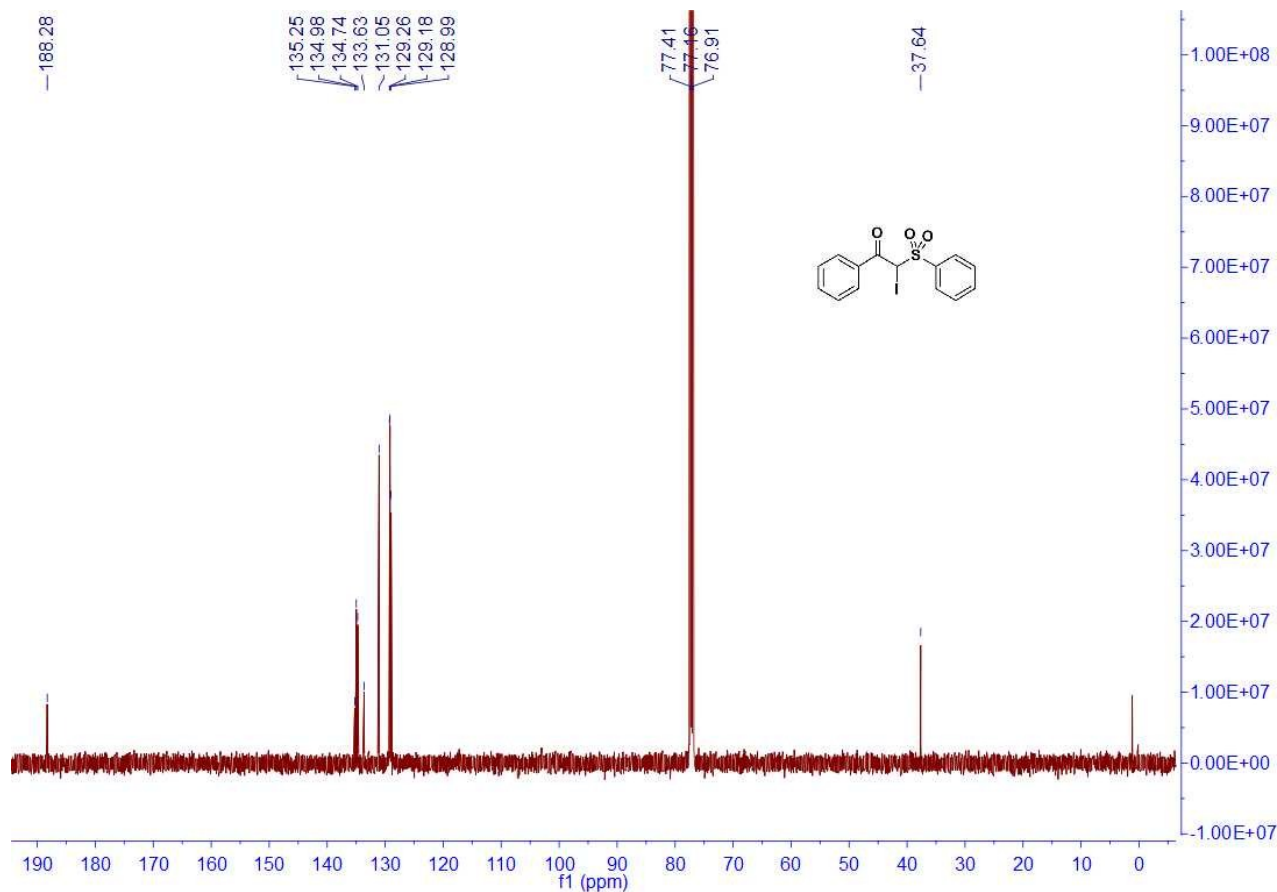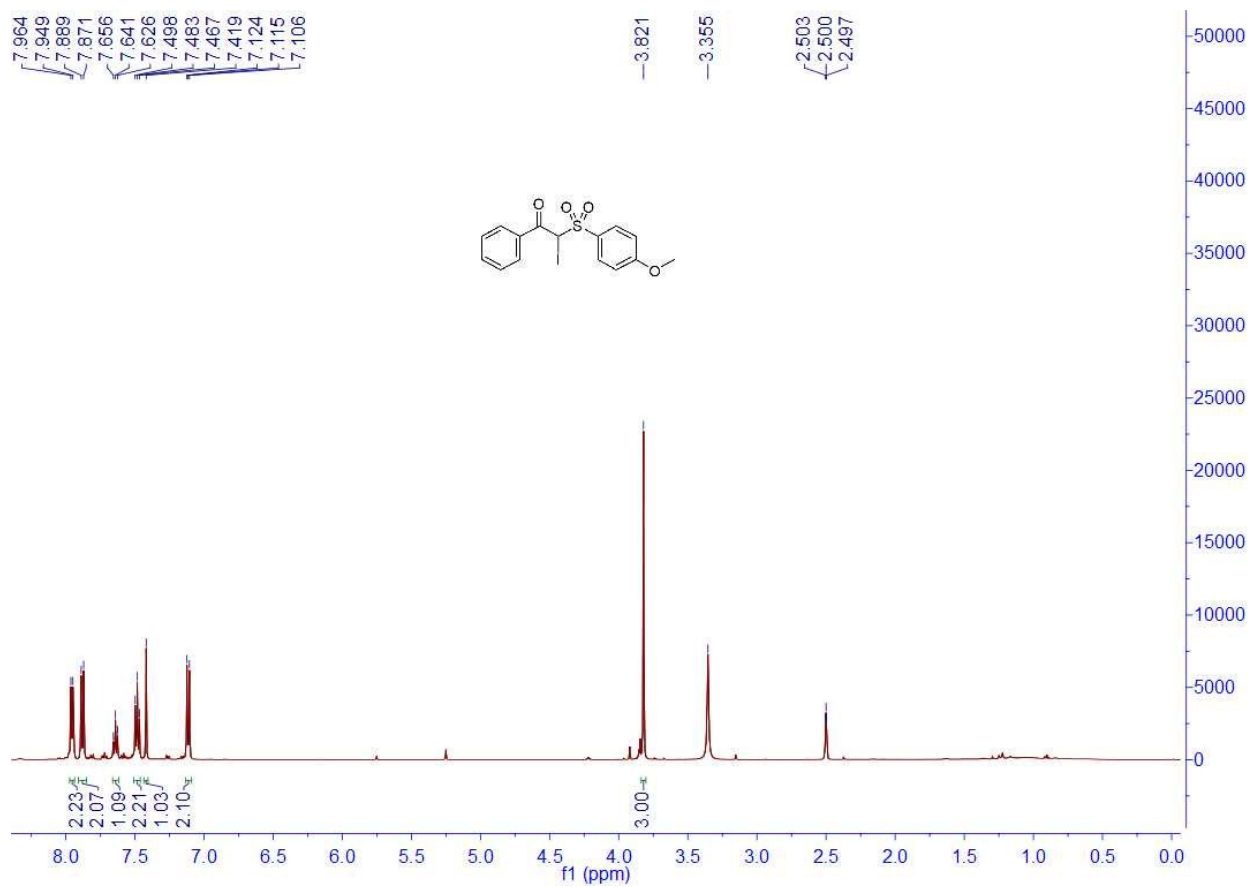

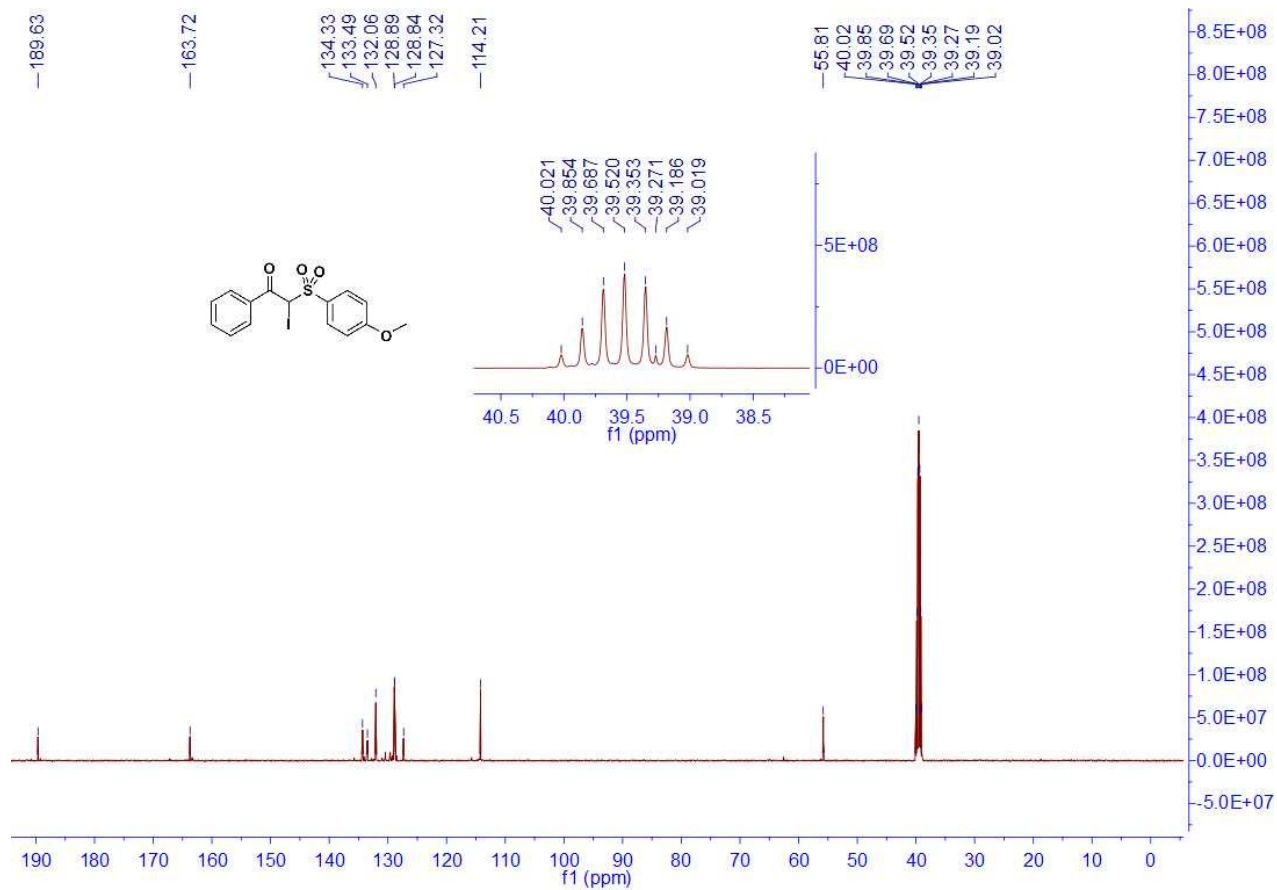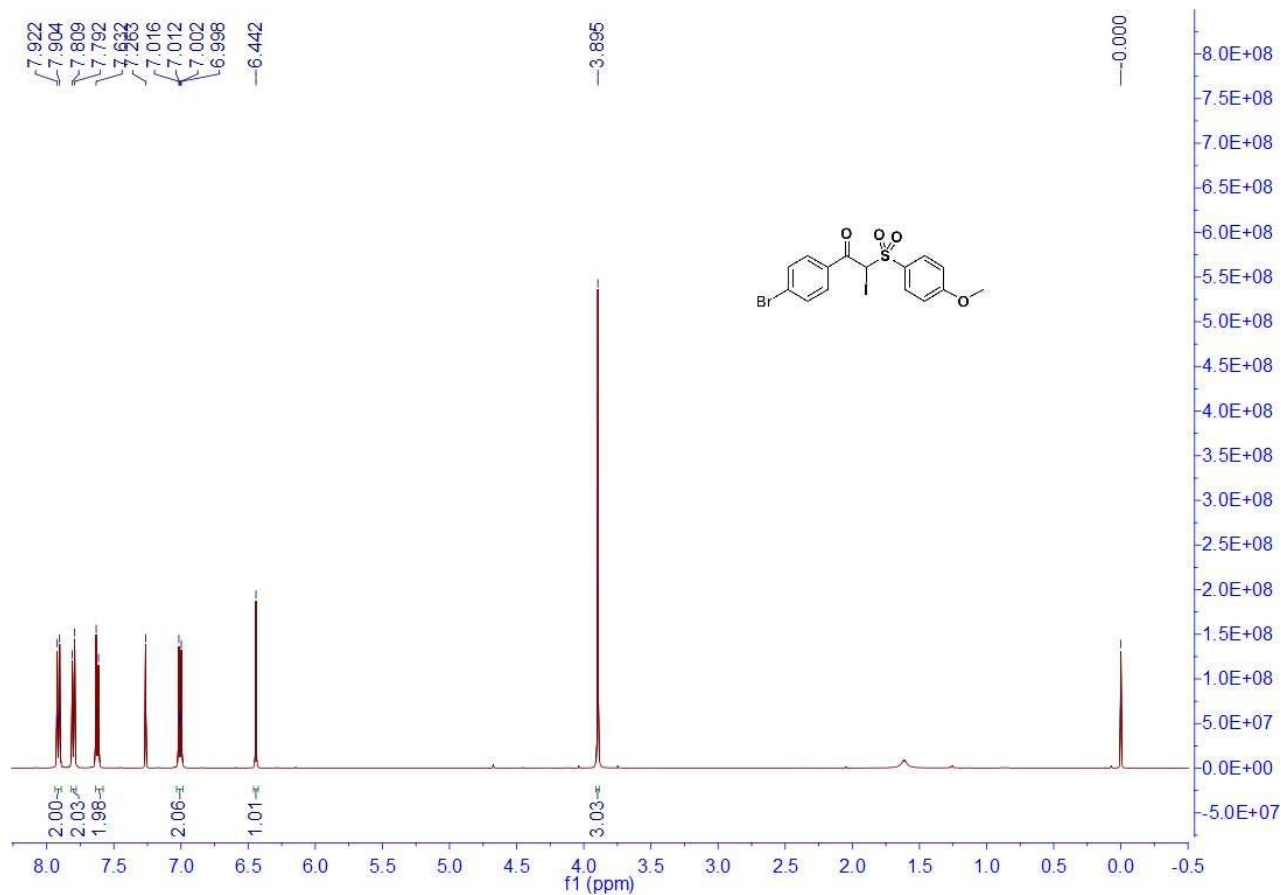

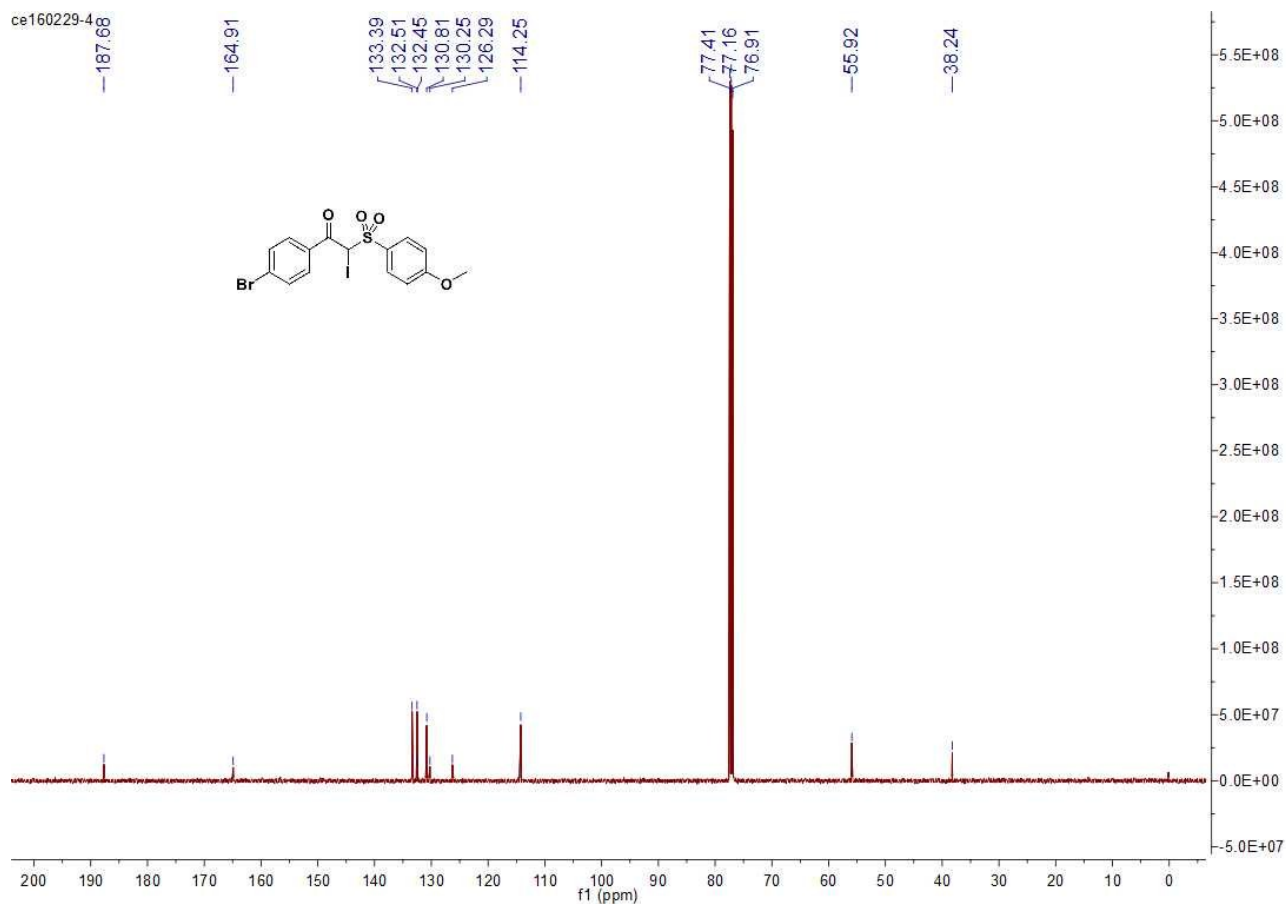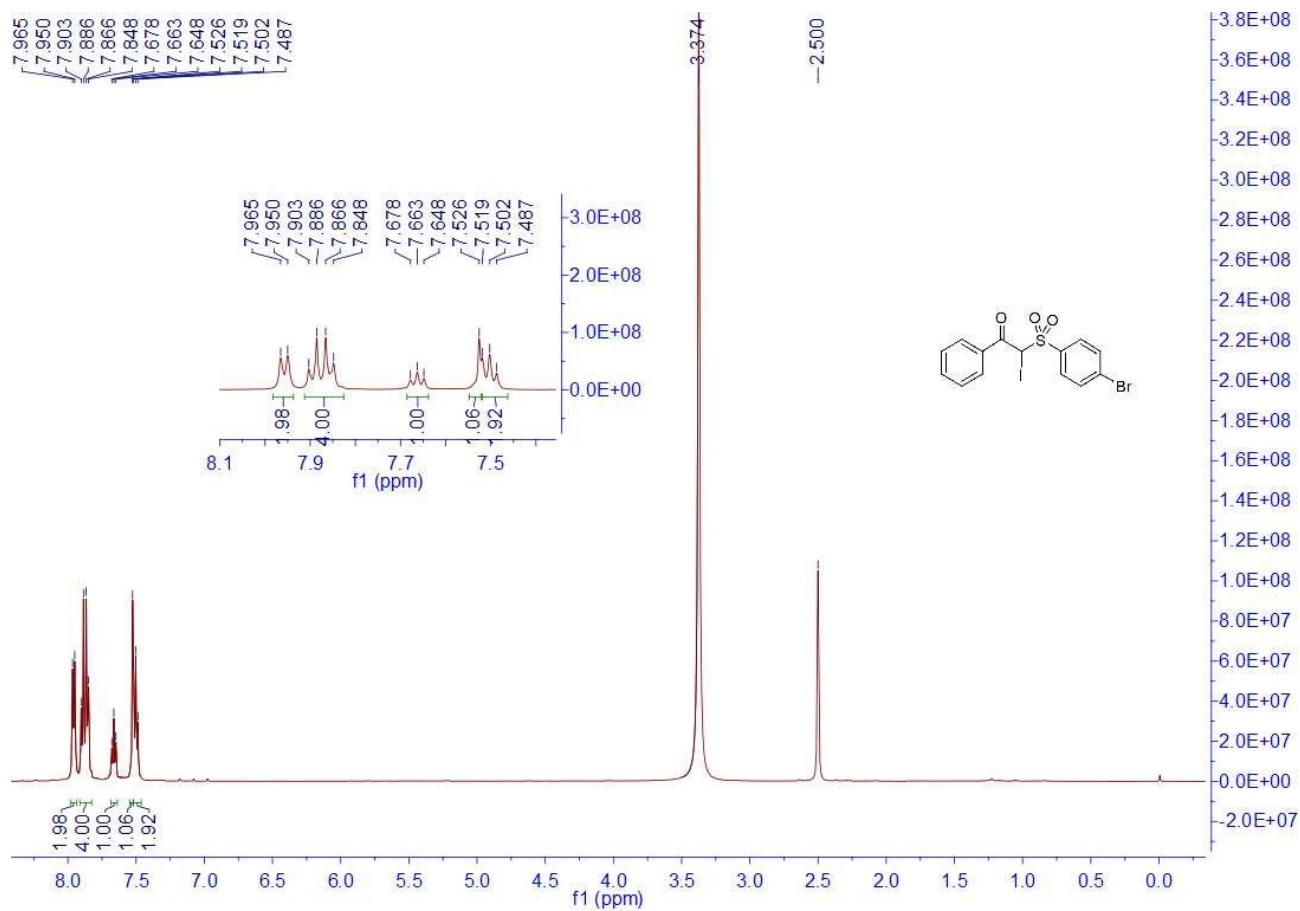

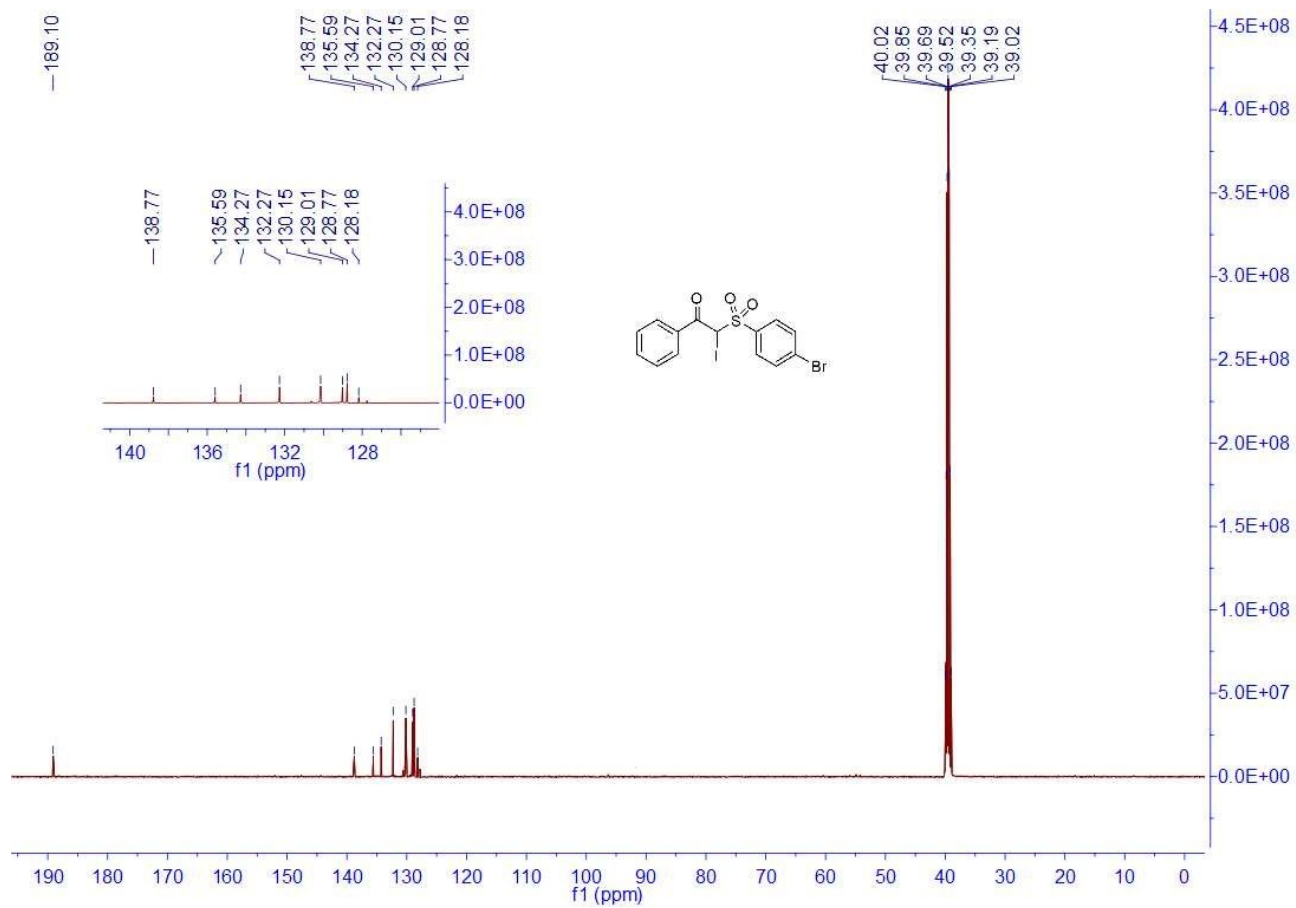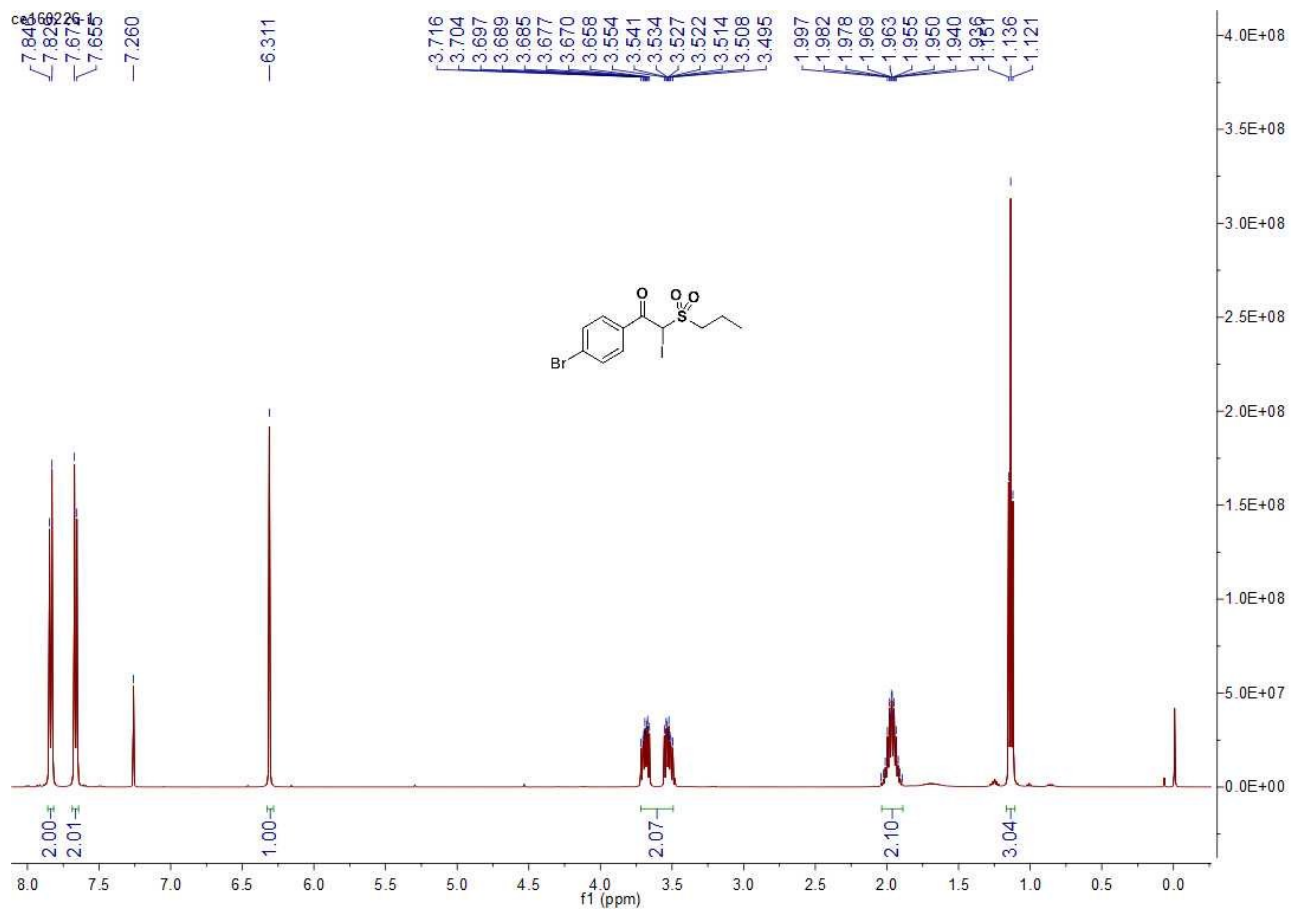



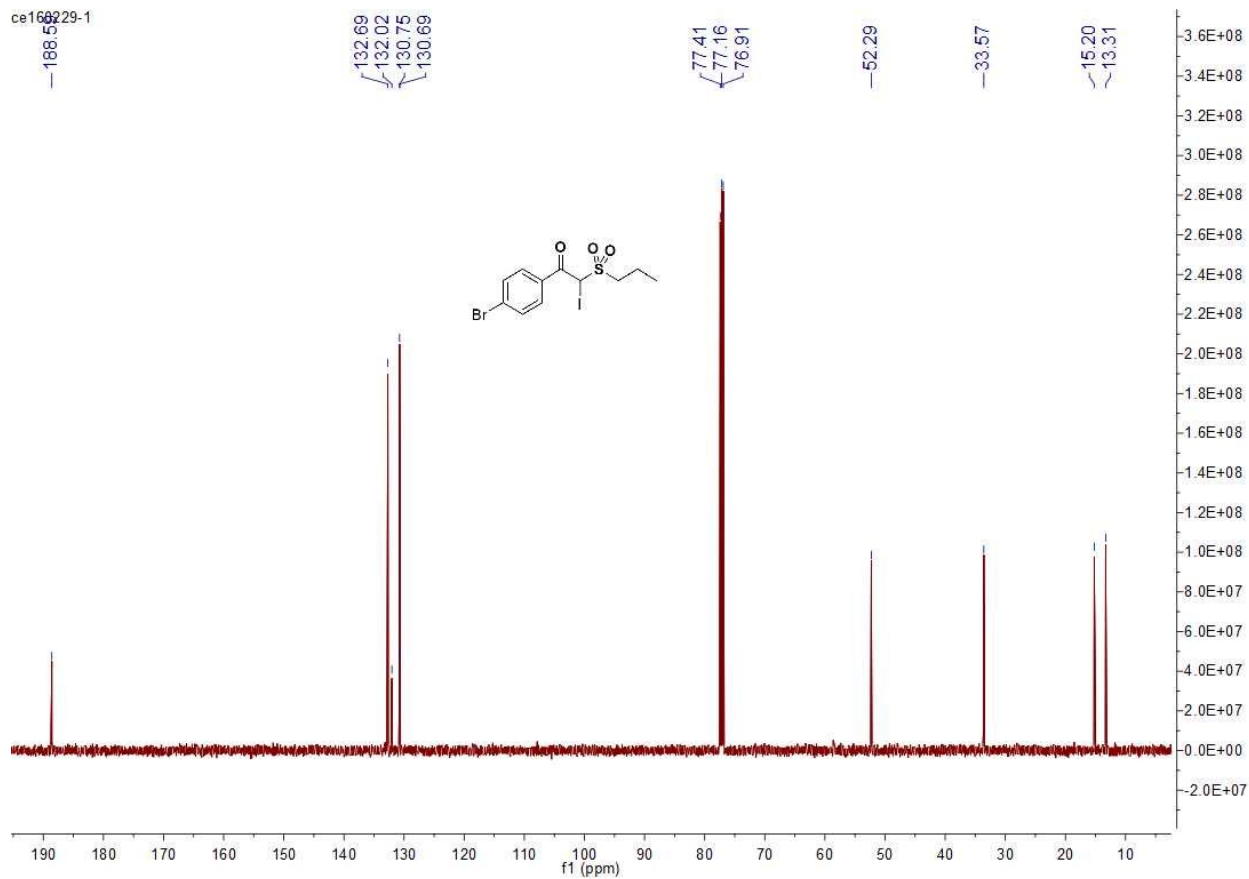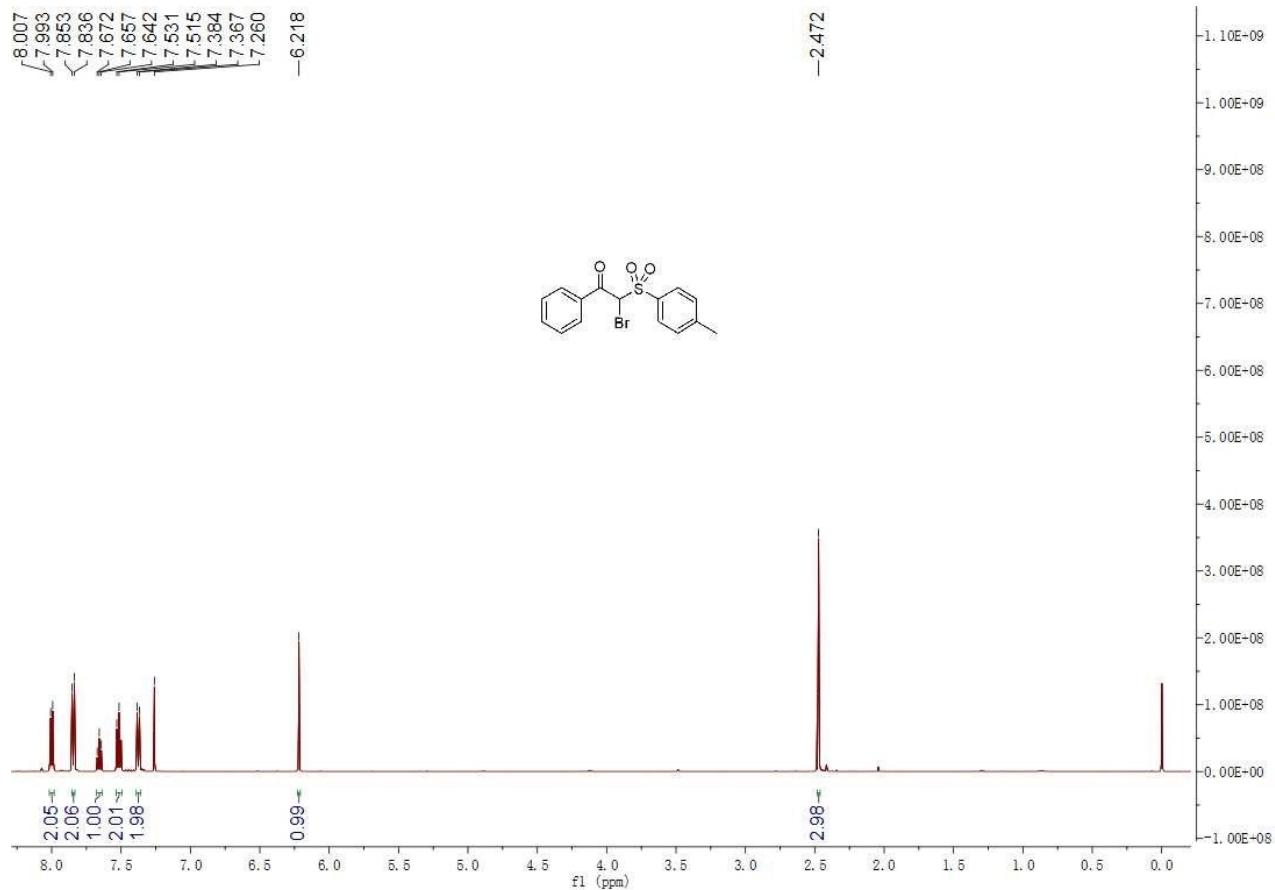

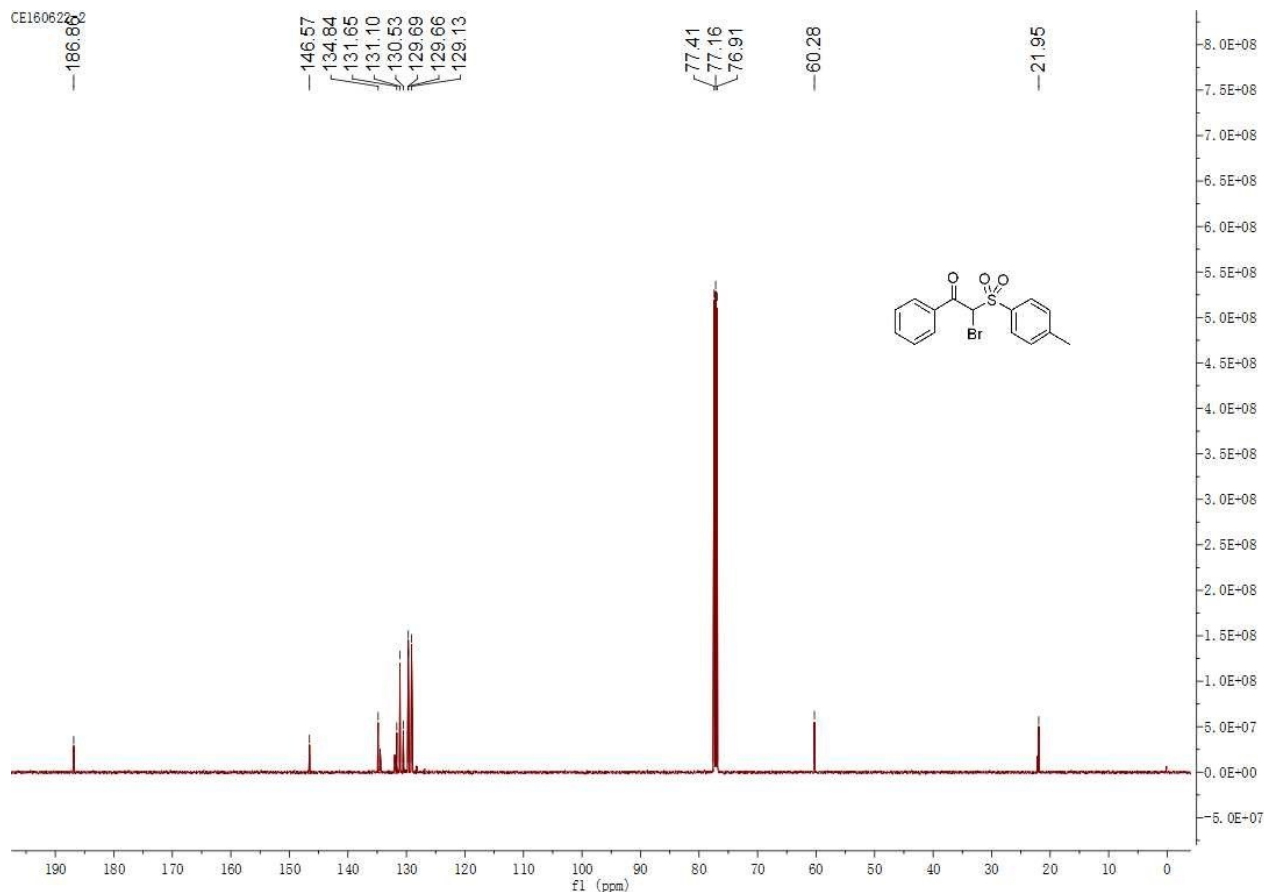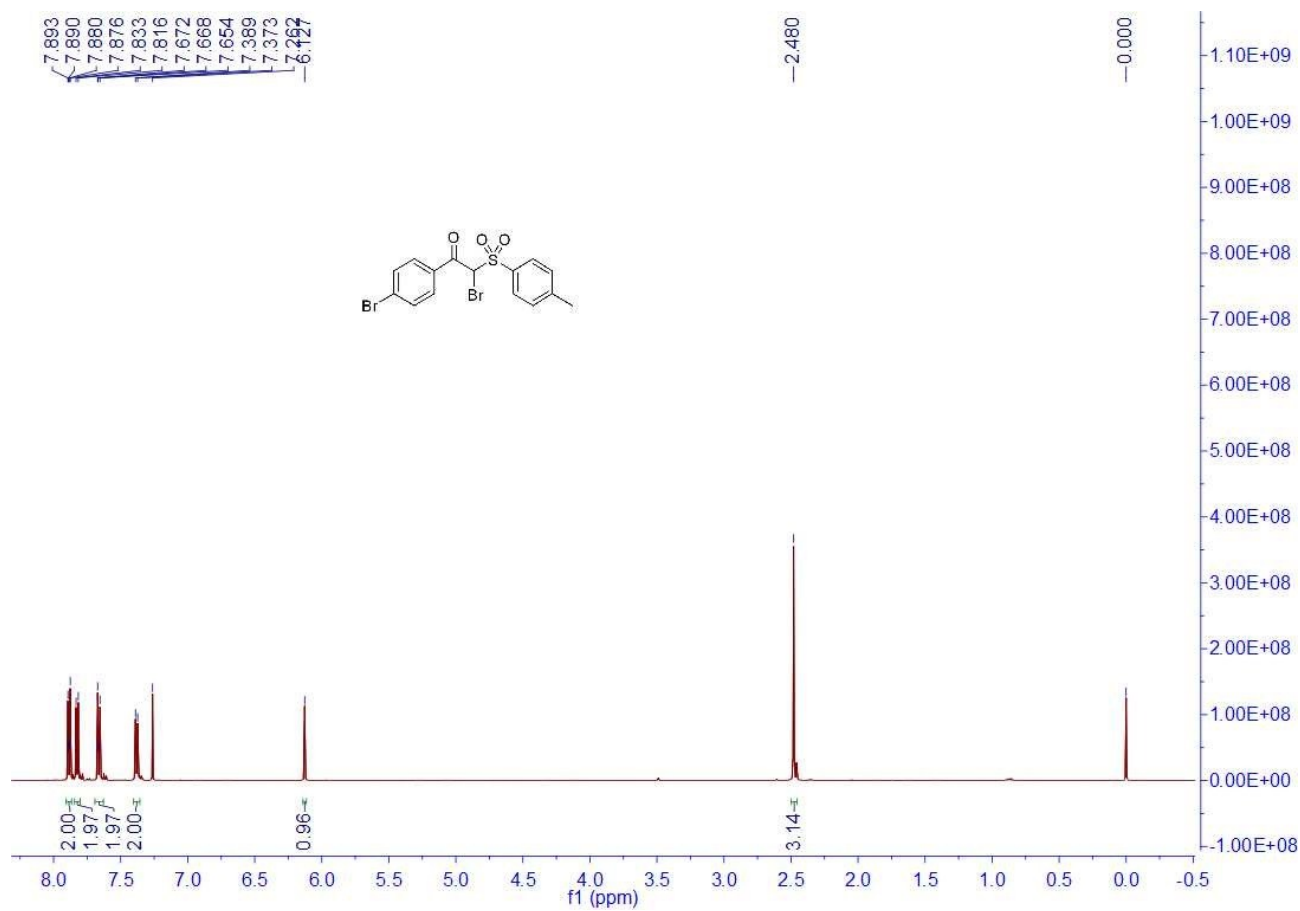

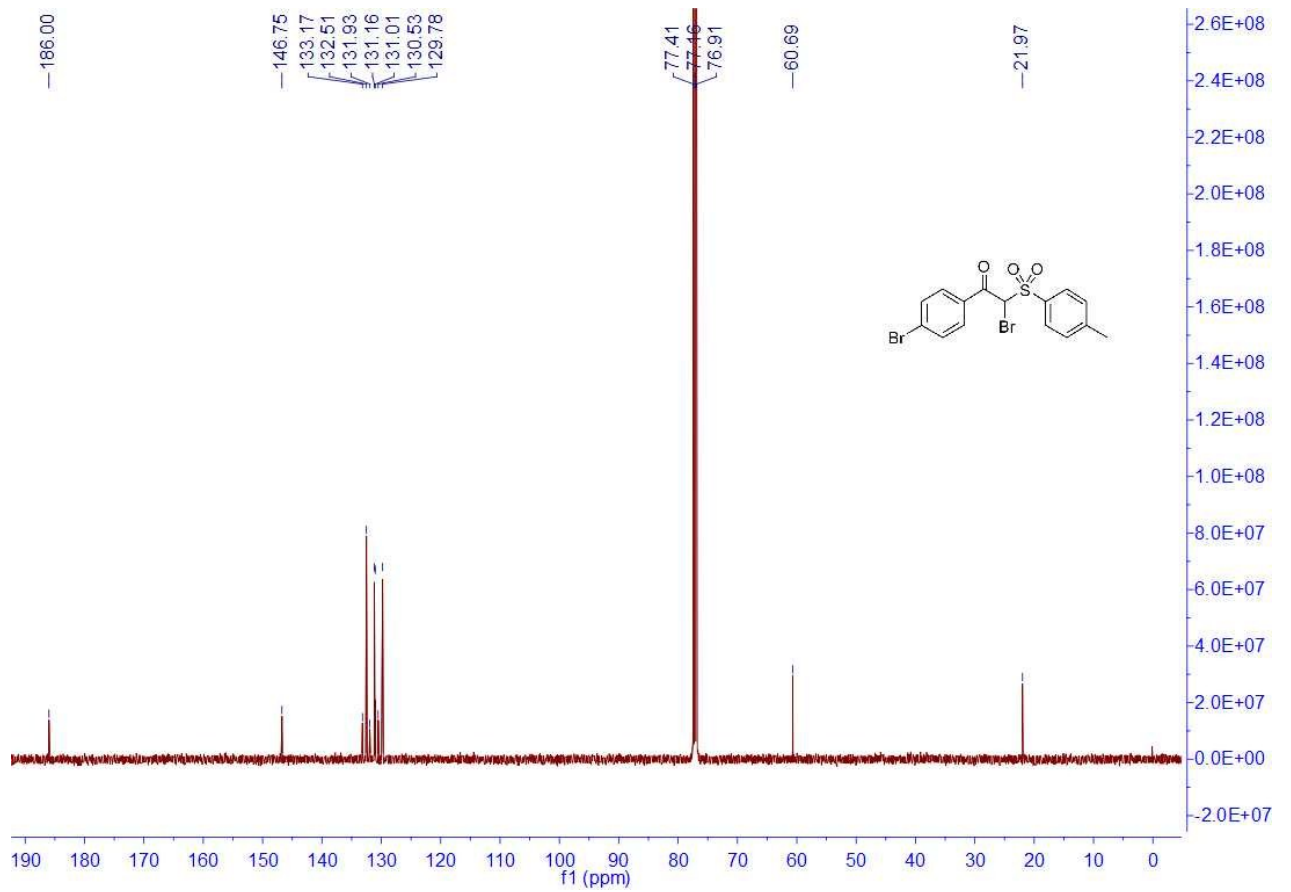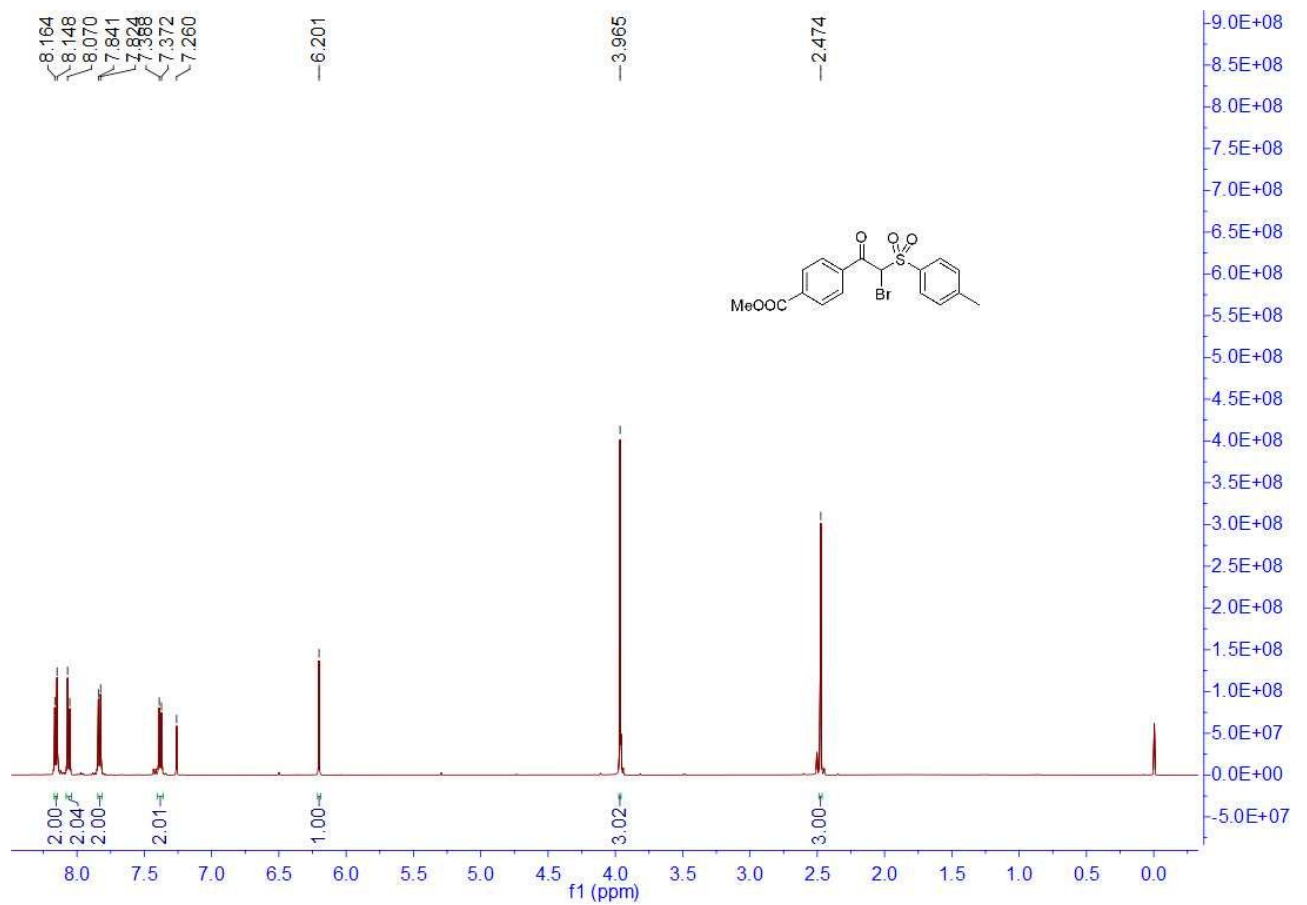

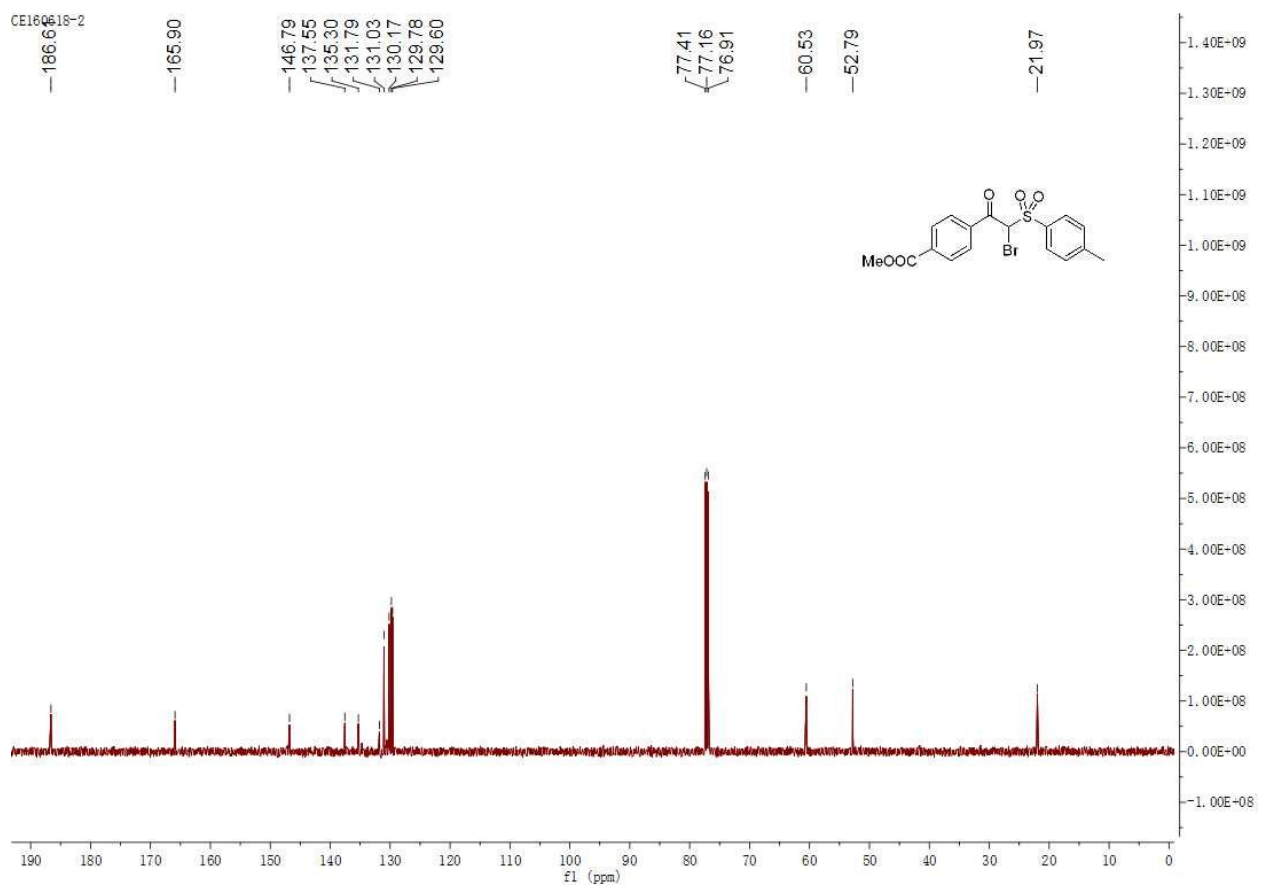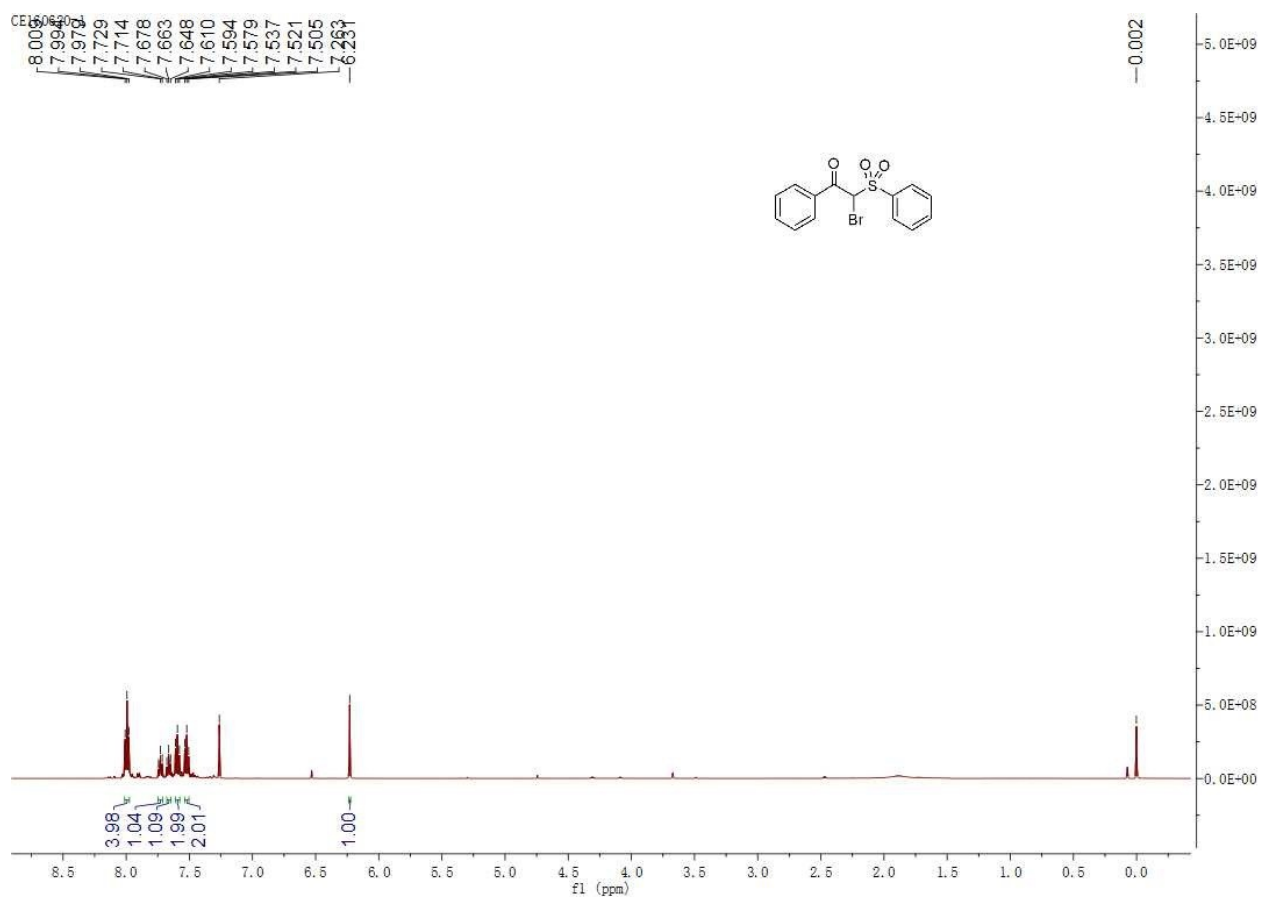

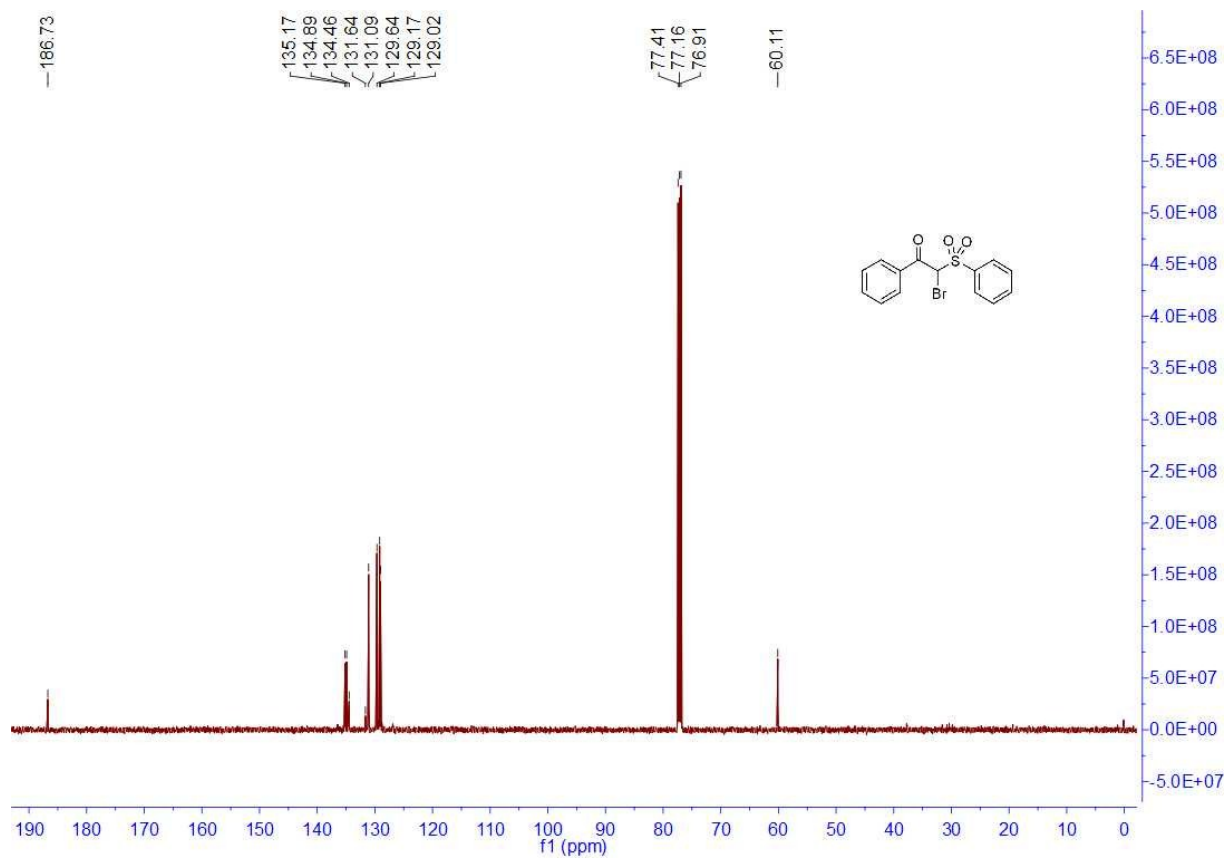

Supplement: c6qo00756b1.pdf [file c6qo00756b1.pdf]
